# Supplementary material
Source: PubMed Central journal article supplement (PMC9179175)
Supplement: mmc1.pdf [file mmc1.pdf]

# THE LANCET

## Digital Health

### Supplementary appendix

This appendix formed part of the original submission and has been peer reviewed. We post it as supplied by the authors.

Supplement to: Thygesen JH, Tomlinson C, Hollings S, et al. COVID-19 trajectories among 57 million adults in England: a cohort study using electronic health records. *Lancet Digit Health* 2022; published online June 8. [https://doi.org/10.1016/S2589-7500\(22\)00091-7](https://doi.org/10.1016/S2589-7500(22)00091-7).

# Supplementary Material - COVID-19 trajectories among 57 million adults in England: a cohort study using electronic health records

## Data sources and data quality

### Primary care

Data in primary care have been sourced from the General Practice Extraction Service (GPES) Data for pandemic planning and research (GDPPR) system which contains SNOMED-CT concepts for patients registered with a primary care physician in the UK. The dataset contains approximately 96% of the English populations and 98% of all English general practices. Patients records were included in GDPPR when they had coded information matching any of the SNOMED-CT concepts in the Code Clusters applicable for COVID-19 planning during primary care consultations <sup>1</sup>. Around 34,000 unique SNOMED-CT concepts are included (>90% of all those currently extracted for a wide range of purposes by NHS Digital's GP Extraction Service), covering a broad range of diagnoses and procedures (from the start of each person's records) along with laboratory results, physical measurements, clinical referrals, and prescriptions. Primary care EHR have been shown to have a high degree of diagnostic accuracy in validation studies <sup>2</sup>

### Hospitalisation

Hospital Episode Statistics (HES) contains administrative data from English hospitals in the National Health Service (NHS). HES captures a) inpatient episodes (including maternity), b) outpatient episodes, c) accidents and emergency attendance (A&E), d) critical care, and e) adult mental health. The primary purpose of HES is to facilitate hospital reimbursement which is actioned through a framework called "Payments by Results"<sup>3</sup>.

HES captures the records of all patients, and their interactions, if they are funded by the NHS irrespective of if they are UK residents or if the care was delivered by an NHS provider. HES record-level data are structured into spells (admissions) which in turn are composed of one or more episodes (most admissions have a single episode)<sup>4</sup>. An episode can be defined as a period of continuous care from a single consultant/speciality and HES contains a row per episode per admission. A spell is terminated when a patient is discharged or dies. HES inpatient data are recorded using WHO ICD-10 and procedures using the Office of Population Censuses and Survey's (OPCS) version 4 clinical classification. A spell can have up to 20 primary and secondary diagnoses or procedures recorded. A primary diagnosis in HES is defined as the main condition treated (or investigated) during the episode of care or where no such definitive diagnosis exists, the main symptom or abnormal finding observed.

HES data are published annually but data are collected through a mechanism known as the Secondary Uses Service (SUS) which curates monthly data extracts from healthcare providers.

These monthly extracts are then subsequently used to populate the HES database. While variation is likely to exist between healthcare providers, coded data from hospitalisations (through Hospital Episode Statistics Admitted Patient Care and Secondary Uses Service) have been shown to be robust: median diagnostic accuracy 80.3% (IQR: 63.3-94.1%) and median procedure accuracy of 84.2% (IQR: 68.7-88.7%)<sup>5</sup>. HES and SUS undergo robust data quality controls and validation rules which are further described along with the data processing pipeline elsewhere<sup>6</sup>.

### **Mortality**

In England (and Wales), when a patient dies, it is the statutory duty of the doctor who had attended in the last illness to issue the death certificate and the Office of National Statistics (ONS) centrally collects and curates all deaths. ONS mortality statistics are considered to be the gold standard for death ascertainment and are routinely used in EHR studies to ascertain deaths. During the pandemic however, there were a variety of changes to the processes in which deaths were certified and registered. For example, the time taken for deaths to be registered decreased while the numbers of conditions recorded on the death certificate were greater for deaths involving COVID-19 than those not involving COVID-19, suggesting higher rates of comorbidities in these deaths and good quality of the certification.<sup>7</sup>

### **Data Linkage**

Individual data sources are linked by NHS Digital using the Master Person Service in combination with the Personal Demographics Service. A linkage score is calculated by cross-referencing information across different sources with the demographics in the Personal Demographics Service and signifies the overall associated match confidence. This score is not directly made available to researchers but NHS Digital's monthly reports for data quality maturity index indicate that 97-100% of records submitted to NHS Digital each month include information on NHS number and other key personal variables, providing confidence in the accuracy of the matching process<sup>8</sup>.

### **Comparison with population estimates**

The dataset comprises more than 96% coverage of the English population and represents the English population in terms of age, sex, ethnicity, and diabetes when compared with UK government official statistics for England, includes the full distribution of general practices according to geographical location and size. The datasets and their underlying characteristics as described in detail elsewhere<sup>9</sup>.

None of the datasets included patients that have explicitly opted out of their EHR being used for medical research. These are referred to as "Type 1 opt-outs" and as of Sept 1 2021 there were 3,264,327 national data opt-outs<sup>10</sup>. Lastly, this is a dynamic cohort where new patients can enter (at birth or new registration with a general practice) during the study period. For example, there are approximately 1 million migrations and student visitors in the UK yearly that are likely to register with a general practitioner but not be adequately captured in the ONS population estimates<sup>11</sup>. As a result, the total number of participants is a cumulative estimate over the study period and does not entirely align with national population estimates<sup>12</sup>.

## COVID-19 event phenotyping methodology

COVID-19 positive tests were defined as a positive result from national testing data (SGSS), encompassing tests from NHS hospitals for those with a clinical need and healthcare workers (known as 'Pillar 1') and swab testing from the wider population (known as 'Pillar 2'). The timeliness and completeness of SGSS has been evaluated and shown to be high<sup>13</sup>.

COVID-19 primary care diagnoses were identified from primary care (GDPPR) using SNOMED-CT terms. SNOMED-CT terms are recorded during primary care consultations by the general practitioner.

COVID-19 hospital admissions were defined as any hospital admission recorded in CHES (COVID-19 specific hospitalisations data) or admissions with a COVID-19 ICD-10 codes in HES APC or SUS as primary or other listed cause of hospitalisation.

Provision of ventilatory support was ascertained from several sources:

- a) patients with an ICU admission recorded in COVID-19 Hospitalisation in England Surveillance System (CHES) or patients with an ICU admission (defined as an entry within HES Adult Critical Care) within the same admission as HES APC,
- b) patients receiving NIV, identified using the OPCS4 code E85.2 (Non-invasive ventilation NEC) or E85.6 (Continuous positive airway pressure), from SUS or HES APC, or a positive number of days receiving basic respiratory support in HES Adult Critical Care, or 'high flow nasal oxygen' or 'non invasive mechanical ventilation' recorded in CHES,
- c) patients receiving Intermittent Mandatory Ventilation (IMV) were identified using OPCS-4 code E85.1 (Invasive ventilation) or X56 (Intubation of trachea), in SUS or HES APC, or a non-zero entry for days receiving advanced respiratory support from HES Adult Critical Care, or 'invasive mechanical ventilation' recorded in CHES,
- d) patients receiving Extracorporeal Membrane Oxygenation (ECMO) identified using OPCS4 X58.1 (Extracorporeal membrane oxygenation) in SUS or HES APC or 'respiratory support ECMO' recorded in CHES.

Fatal COVID-19 events were identified from ONS Civil Registration of Deaths and secondary care (HES APC, SUS) and defined as:

- a) a suspected or confirmed COVID-19 diagnosis ICD-10 term present in any position on the death certificate,
- b) death within 28-days of the first recorded COVID-19 event (positive test, diagnosis or admission), irrespective of the cause of death recorded on the death certificate, or

c) a COVID-19 hospital admission with a discharge method (dismeth) or destination (disdest) denoting death, irrespective of cause and duration after the index event. See Supplementary Table 2 for the specific codes used.

Phenotype definitions were reviewed by clinicians, health data scientists and epidemiologists and validated by quantifying cross-EHR source concordance and checking consistency of findings with established risk factors from the literature, in keeping with the CALIBER approach<sup>14</sup>.

## Ethical and Regulatory Approvals

Data access approval was granted to the CVD-COVID-UK consortium (under project proposal CCU013 High-throughput electronic health record phenotyping approaches) through the NHS Digital online Data Access Request Service <sup>15</sup> (ref. DARS-NIC-381078-Y9C5K). For full detail see supplementary methods. The BHF Data Science Centre approvals and oversight board deemed that this project's work fell within the scope of the consortium's ethical and regulatory approvals. Analyses were conducted by three approved researchers (JHT, CT, SD) via secure remote access to the TRE. Only summarised, aggregate results were exported, following manual review by the NHS Digital 'safe outputs' escrow service, to ensure no output placed in the public domain contains information that may be used to identify an individual <sup>9</sup>. The North East-Newcastle and North Tyneside 2 research ethics committee provided ethical approval for the CVD-COVID-UK research programme (REC No 20/NE/0161).

## Collaborators

List of CVD-COVID-UK/COVID-IMPACT Consortium members and primary institutional affiliation as of 3rd of March 2022.

Authors of the paper are highlighted in yellow

| <b>Member Name</b>       | <b>Institution</b>         |
|--------------------------|----------------------------|
| Abdel Douiri             | King's College London      |
| Abdelaali Hassaine       | University of Oxford       |
| Abdul Qadr Akinoso-Imran | Queen's University Belfast |
| Abraham Olvera-Barrios   | University College London  |
| Adejoke Oluyase          | King's College London      |
| Adnan Tufail             | University College London  |
| Ajay Shah                | King's College London      |
| Alan Carson              | University of Edinburgh    |
| Alasdair Warwick         | University College London  |
| Alastair Denniston       | INSIGHT                    |
| Alastair Proudfoot       | Barts Health NHS Trust     |
| Alex Handy               | University College London  |
| Alexandru Dregan         | King's College London      |
| Alun Davies              | Imperial College London    |
| Alvina Lai               | University College London  |
| Amanj Kurdi              | University of Strathclyde  |
| Ami Banerjee             | University College London  |
| Amir Gavrieli            | University of Cambridge    |
| Ana Torralbo             | University College London  |
| Andrew Lambarth          | University College London  |
| Angela Henderson         | University of Glasgow      |
| Angela Wood              | University of Cambridge    |
| Anna Bone                | King's College London      |
| Anna Hansell             | University of Leicester    |
| Annemarie Docherty       | University of Edinburgh    |
| Anthony Khawaja          | University College London  |
| Antonella Delmestri      | University of Oxford       |

Supplementary Material - COVID-19 trajectories among 57 million adults in England: a cohort study using electronic health records

---

|                              |                                                          |
|------------------------------|----------------------------------------------------------|
| Aoife McCarthy               | University of Edinburgh                                  |
| Arun Karthikeyan Suseeladevi | University of Bristol                                    |
| Arun Pherwani                | University Hospital of North Midlands                    |
| Ashkan Dashtban              | University College London                                |
| <b>Ashley Akbari</b>         | <b>Swansea University</b>                                |
| Badar Ahmed                  | NHS Digital                                              |
| Baljean Dhillon              | University of Edinburgh                                  |
| Ben Bray                     | King's College London                                    |
| Ben Goldacre                 | University of Oxford                                     |
| Ben Humberstone              | Office for National Statistics                           |
| Ben Lacey                    | University of Oxford                                     |
| <b>Bilal Mateen</b>          | <b>Wellcome Trust</b>                                    |
| Brian Roberts                | NHS Digital                                              |
| Cameron Razieh               | University of Leicester                                  |
| Camille Harrison             | Office for National Statistics                           |
| Carmen Petitjean             | University of Cambridge                                  |
| Carole Morris                | NHS Scotland                                             |
| Caroline Dale                | University College London                                |
| Caroline Jackson             | University of Edinburgh                                  |
| Caroline Rogers              | Healthcare Quality Improvement Partnership               |
| <b>Cathie Sudlow</b>         | <b>Health Data Research UK / BHF Data Science Centre</b> |
| Charles Wolfe                | King's College London                                    |
| Christian Schnier            | University of Edinburgh                                  |
| <b>Christopher Tomlinson</b> | <b>University College London</b>                         |
| Claire Lawson                | University of Leicester                                  |
| Claire Tochel                | University of Edinburgh                                  |
| Clare Gillies                | University of Leicester                                  |
| Clea du Toit                 | University of Glasgow                                    |
| Colin Berry                  | University of Glasgow                                    |
| Costas Kallis                | Imperial College London                                  |
| Craig Melville               | University of Glasgow                                    |
| Craig Smith                  | University of Manchester                                 |
| Dan O'Connell                | British Heart Foundation                                 |
| Dani Prieto-Alhambra         | University of Oxford                                     |

Supplementary Material - COVID-19 trajectories among 57 million adults in England: a cohort study using electronic health records

---

|                          |                                              |
|--------------------------|----------------------------------------------|
| Daniel Harris            | Swansea Bay University Health Board          |
| Daniel Morales           | University of Dundee                         |
| David Brind              | University of Cambridge                      |
| David Cromwell           | Royal College of Surgeons of England         |
| David Hughes             | University of Liverpool                      |
| David Jenkins            | University of Manchester                     |
| David Moreno Martos      | University of Dundee                         |
| David Selby              | University College London                    |
| Deborah Kinnear          | University of Glasgow                        |
| Deborah Lawler           | University of Bristol                        |
| Deborah Lowe             | NHS England                                  |
| Deepti Gurdasani         | Queen Mary University of London              |
| Dexter Canoy             | University of Oxford                         |
| Dominic Oliver           | King's College London                        |
| Efosa Omigie             | NHS Digital                                  |
| Elena Nikiphorou         | King's College London                        |
| Elena Raffetti           | University of Cambridge                      |
| Elias Allara             | University of Cambridge                      |
| Elizabeth A Ellins       | Swansea University                           |
| Eloise Withnell          | University College London                    |
| Elsie Horne              | University of Bristol                        |
| Emanuele Di Angelantonio | University of Cambridge                      |
| Emma Copland             | University of Oxford                         |
| Eva Morris               | University of Oxford                         |
| Evaleen Malgapo          | University College London                    |
| Evan Kontopantelis       | University of Manchester                     |
| Ewan Birney              | European Bioinformatics Institute            |
| Fabian Falck             | University of Cambridge                      |
| Fatemeh Torabi           | Swansea University                           |
| Felix Greaves            | NICE                                         |
| Filip Sosenko            | University of Glasgow                        |
| Flavien Hardy            | University College London                    |
| Florian Falter           | Royal Papworth Hospital NHS Foundation Trust |
| Francesco Zaccardi       | University of Leicester                      |



Supplementary Material - COVID-19 trajectories among 57 million adults in England: a cohort study using electronic health records

---

|                        |                                                  |
|------------------------|--------------------------------------------------|
| Frank Kee              | Queen's University Belfast                       |
| Frederick Ho           | University of Glasgow                            |
| Freya Allery           | University College London                        |
| Gareth Davies          | Swansea University                               |
| Gareth Williams        | King's College London                            |
| Genevieve Cezard       | University of Cambridge                          |
| George Nicholson       | University of Oxford                             |
| George Tilston         | University of Manchester                         |
| Gwenetta Curry         | University of Edinburgh                          |
| Hannah Whittaker       | Imperial College London                          |
| Haoting Zhang          | University of Cambridge                          |
| Harry Hemingway        | University College London                        |
| Harry Watson           | King's College London                            |
| Harry Wilde            | University of Warwick                            |
| Hoda Abbasizanjani     | Swansea University                               |
| Honghan Wu             | University College London                        |
| Howard Tang            | University of Cambridge                          |
| Huan Wang              | University of Dundee                             |
| Huayu Zhang            | University of Edinburgh                          |
| Ify Mordi              | University of Dundee                             |
| Irene Higginson        | King's College London                            |
| Jake Kasan             | NHS Digital                                      |
| James Sheppard         | University of Oxford                             |
| Jane Lyons             | Swansea University                               |
| Javiera Leniz Martelli | King's College London                            |
| Jayati Das-Munshi      | King's College London                            |
| Jen-Yu Amy Chang       | University of Sheffield                          |
| Jennifer Beveridge     | NICE                                             |
| Jennifer Cooper        | University of Bristol                            |
| Jennifer Quint         | Imperial College London                          |
| Jennifer Rossdale      | Royal United Hospitals Bath NHS Foundation Trust |
| Jessica Barrett        | University of Cambridge                          |
| Jianhua Wu             | University of Leeds                              |
| Jill Pell              | University of Glasgow                            |

Supplementary Material - COVID-19 trajectories among 57 million adults in England: a cohort study using electronic health records

---

|                     |                                                   |
|---------------------|---------------------------------------------------|
| Jinge Wu            | University College London                         |
| Joanna Davies       | King's College London                             |
| Johan Thygesen      | University College London                         |
| Johannes Heyl       | University College London                         |
| John Danesh         | University of Cambridge                           |
| John Dennis         | University of Exeter                              |
| John Macleod        | University of Bristol                             |
| John Nolan          | Health Data Research UK / BHF Data Science Centre |
| Johnny Downs        | King's College London                             |
| Jon Boyle           | Addenbrooke's Hospital                            |
| Jon Shelton         | Cancer Research UK                                |
| Jonathan Sterne     | University of Bristol                             |
| Joseph Firth        | University of Manchester                          |
| Joshua Day          | NHS Digital                                       |
| Julia Hippisley-Cox | University of Oxford                              |
| Julia Townson       | Cardiff University                                |
| Julian Halcox       | Swansea University                                |
| Kamlesh Khunti      | University of Leicester                           |
| Kate Cheema         | British Heart Foundation                          |
| Katherine Brown     | Great Ormond Street Hospital                      |
| Katherine Sleeman   | King's College London                             |
| Katie Harron        | University College London                         |
| Kazem Rahimi        | University of Oxford                              |
| Ken Li              | University College London                         |
| Kim Kavanagh        | University of Strathclyde                         |
| Lamiece Hassan      | University of Manchester                          |
| Lana Bojanić        | University of Manchester                          |
| Lars Murdock        | Cancer Research UK                                |
| Laura North         | Swansea University                                |
| Laura Pasea         | University College London                         |
| Livia Pierotti      | University of Bristol                             |
| Lorna Fraser        | University of York                                |
| Luanluan Sun        | University of Cambridge                           |
| Luca Grieco         | University College London                         |

Supplementary Material - COVID-19 trajectories among 57 million adults in England: a cohort study using electronic health records

---

|                          |                                                   |
|--------------------------|---------------------------------------------------|
| Lucy Wright              | University of Oxford                              |
| Luisa Zuccolo            | University of Bristol                             |
| Lynn Morrice             | Health Data Research UK / BHF Data Science Centre |
| Mamas Mamas              | Keele University                                  |
| Maria Sudell             | University of Liverpool                           |
| Marion Bennie            | University of Strathclyde                         |
| Mark Ashworth            | University of Oxford                              |
| Mark Barber              | NHS Lanarkshire                                   |
| Mark Green               | University of Liverpool                           |
| Marta Pineda Moncusi     | University of Oxford                              |
| Martha Elwenspoek        | University of Bristol                             |
| Martina Slapkova         | Cancer Research UK                                |
| Mary Joan Macleod        | University of Aberdeen                            |
| Massimo Caputo           | University of Bristol                             |
| Matt Sydes               | University College London                         |
| Matthew Sperrin          | University of Manchester                          |
| Maya Buch                | University of Manchester                          |
| Mehrdad Mizani           | University College London                         |
| Mevhibe Hocaoglu         | King's College London                             |
| Michael Sweeting         | University of Leicester                           |
| Michalis Katsoulis       | University College London                         |
| Michelle Williams        | University of Edinburgh                           |
| Miguel Bernabeu Llinares | University of Edinburgh                           |
| Mike Inouye              | University of Cambridge                           |
| Milad Nazarzadeh Larzjan | University of Oxford                              |
| Mira Hidajat             | University of Bristol                             |
| Mirek Skrypak            | Healthcare Quality Improvement Partnership        |
| Mohammad Mamouei         | University of Oxford                              |
| Moritz Gerstung          | European Bioinformatics Institute                 |
| Munir Pirmohamed         | University of Liverpool                           |
| Myer Glickman            | Office for National Statistics                    |
| Naomi Herz               | British Heart Foundation                          |
| Naveed Sattar            | University of Glasgow                             |
| Nazrul Islam             | University of Oxford                              |

Supplementary Material - COVID-19 trajectories among 57 million adults in England: a cohort study using electronic health records

---

|                   |                                                   |
|-------------------|---------------------------------------------------|
| Neil Davies       | University of Bristol                             |
| Nick Hall         | University of Oxford                              |
| Nida Ahmed        | Barts Health NHS Trust                            |
| Nilesh Samani     | British Heart Foundation                          |
| Norman Briffa     | University of Sheffield                           |
| Olena Seminog     | University of Oxford                              |
| Owen Pickrell     | Swansea University                                |
| Paula Lorgelly    | University College London                         |
| Pedro Machado     | University College London                         |
| Pia Hardelid      | University College London                         |
| Qiuju Li          | London School of Hygiene & Tropical Medicine      |
| Rachel Cripps     | King's College London                             |
| Rachel Denholm    | University of Bristol                             |
| Raph Goldacre     | University of Oxford                              |
| Raymond Carragher | Queen's University Belfast                        |
| Rebecca Crallan   | Cancer Research UK                                |
| Rebecca Milton    | Cardiff University                                |
| Reecha Sofat      | University of Liverpool                           |
| Renin Toms        | University of Bristol                             |
| Richard Chin      | University of Edinburgh                           |
| Richard Killick   | King's College London                             |
| Richard Williams  | University of Manchester                          |
| Riyaz Patel       | University College London                         |
| Rocco Friebel     | London School of Economics & Political Science    |
| Rochelle Knight   | University of Bristol                             |
| Rohan Takhar      | University College London                         |
| Ronan Lyons       | Swansea University                                |
| Rosie Hinchliffe  | Cancer Research UK                                |
| Rouven Priedon    | Health Data Research UK / BHF Data Science Centre |
| Rowena Griffiths  | Swansea University                                |
| Roy Schwartz      | University College London                         |
| Rupert Payne      | University of Bristol                             |
| Russell Healey    | NHS Digital                                       |
| Rutendo Mapeta    | University of Cambridge                           |

Supplementary Material - COVID-19 trajectories among 57 million adults in England: a cohort study using electronic health records

---

|                           |                                                   |
|---------------------------|---------------------------------------------------|
| Ruth Gilbert              | University College London                         |
| Ruth Norris               | University of Manchester                          |
| Ruth Watkinson            | University of Manchester                          |
| Ruwanthi Kolamunnage-Dona | University of Liverpool                           |
| Safa Salim                | Imperial College London                           |
| Salil Deo                 | University of Glasgow                             |
| Sam Hollings              | NHS Digital                                       |
| Samantha Ip               | University of Cambridge                           |
| Sandosh Padmanabhan       | University of Glasgow                             |
| Sara Khalid               | University of Oxford                              |
| Sarah Onida               | Imperial College London                           |
| Sarah Steeg               | University of Manchester                          |
| Seamus Kent               | NICE                                              |
| Seb Bacon                 | University of Oxford                              |
| Sebastian Vollmer         | The Alan Turing Institute                         |
| Serban Stoica             | University Hospital Bristol NHS Foundation Trust  |
| Shane Johnson             | Cancer Research UK                                |
| Sharmin Shabnam           | University of Leicester                           |
| Shishir Rao               | University of Oxford                              |
| Shubhra Sinha             | University of Bristol                             |
| Sinduja Manohar           | Health Data Research UK                           |
| Sonya Babu-Narayan        | British Heart Foundation                          |
| Spencer Keene             | University of Cambridge                           |
| Spiros Denaxas            | University College London                         |
| Steve Ball                | NHS Digital                                       |
| Susheel Varma             | Health Data Research UK                           |
| Tanja Mueller             | University of Strathclyde                         |
| Tapiwa Tungamirai         | Wellcome Sanger Institute                         |
| Tasaneer Braithwaite      | Guy's and St Thomas' NHS Foundation Trust         |
| Teri-Louise North         | University of Bristol                             |
| Terry Quinn               | University of Glasgow                             |
| Thomas Bolton             | Health Data Research UK / BHF Data Science Centre |
| Thomas Lawrence           | NICE                                              |
| Tianxiao Wang             | University of Cambridge                           |

Supplementary Material - COVID-19 trajectories among 57 million adults in England: a cohort study using electronic health records

---

|                     |                                |
|---------------------|--------------------------------|
| Tim Dong            | University of Bristol          |
| Tim Wilkinson       | University of Edinburgh        |
| Tom Norris          | University of Leicester        |
| Tom Palmer          | University of Bristol          |
| Tom Yates           | University of Leicester        |
| Tuankasfee Hama     | University College London      |
| Umesh Kadam         | University of Leicester        |
| Vahé Nafilyan       | Office for National Statistics |
| Vandana Ayyar-Gupta | NICE                           |
| Vasa Curcin         | King's College London          |
| Venexia Walker      | University of Bristol          |
| William Whiteley    | University of Edinburgh        |
| Xiyun Jiang         | University of Cambridge        |
| Yat Yi Fan          | University College London      |
| Yi Mu               | University College London      |
| Yogini Chudasama    | University of Leicester        |
| Zainab Karim        | British Heart Foundation       |

## Supplementary Figures

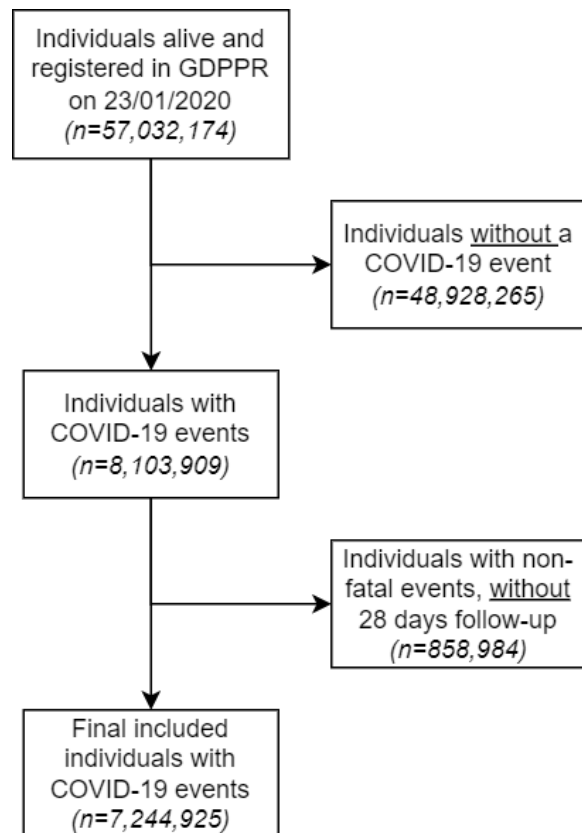

**Supplementary figure 1: Flowchart of cohort design showing the number of records/individuals** Excluded individuals at different stages and the identification of cases and the final study population.

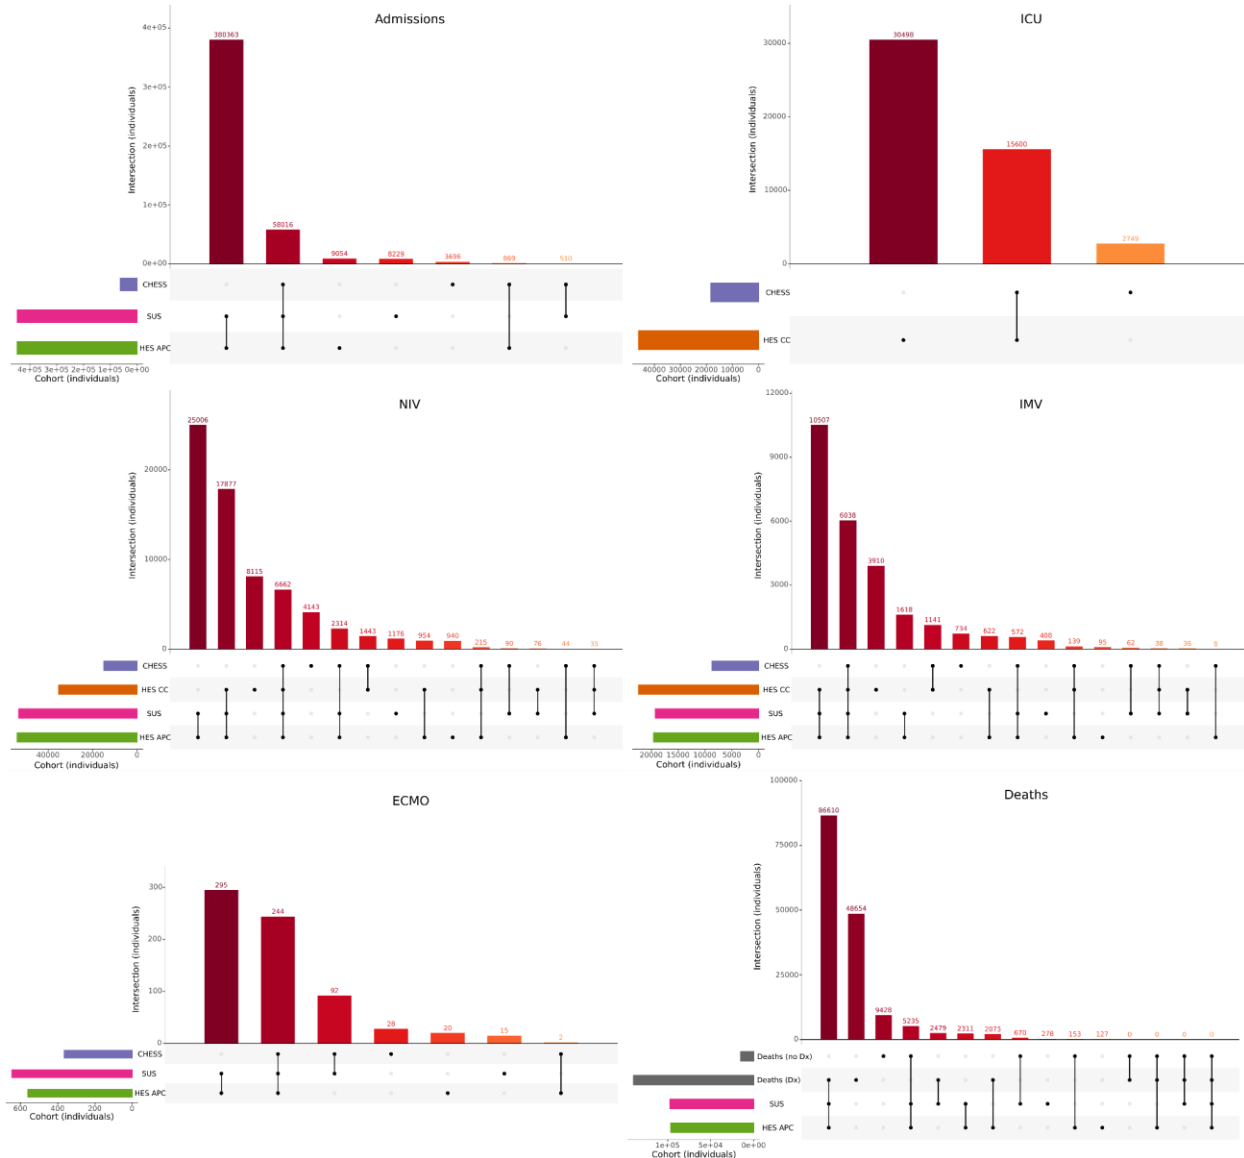

**Supplementary figure 2: UpSet plots illustrating the numbers of individuals experiencing each COVID-19 event.**

Vertical bars report unique individuals in the intersection denoted by the intersection matrix below. Horizontal bars report unique individuals identified from each dataset. Datasets are HES (Hospital episode statistics) APC (Admitted Patient Care) and CC (Critical Care), SUS (Secondary Uses Service) and CHES (COVID-19 Hospitalisations in England Surveillance System) and ONS (Office of National Statistics) Civil Registration of Deaths. Positive tests and primary care diagnoses are not shown as these are derived from a single data source.



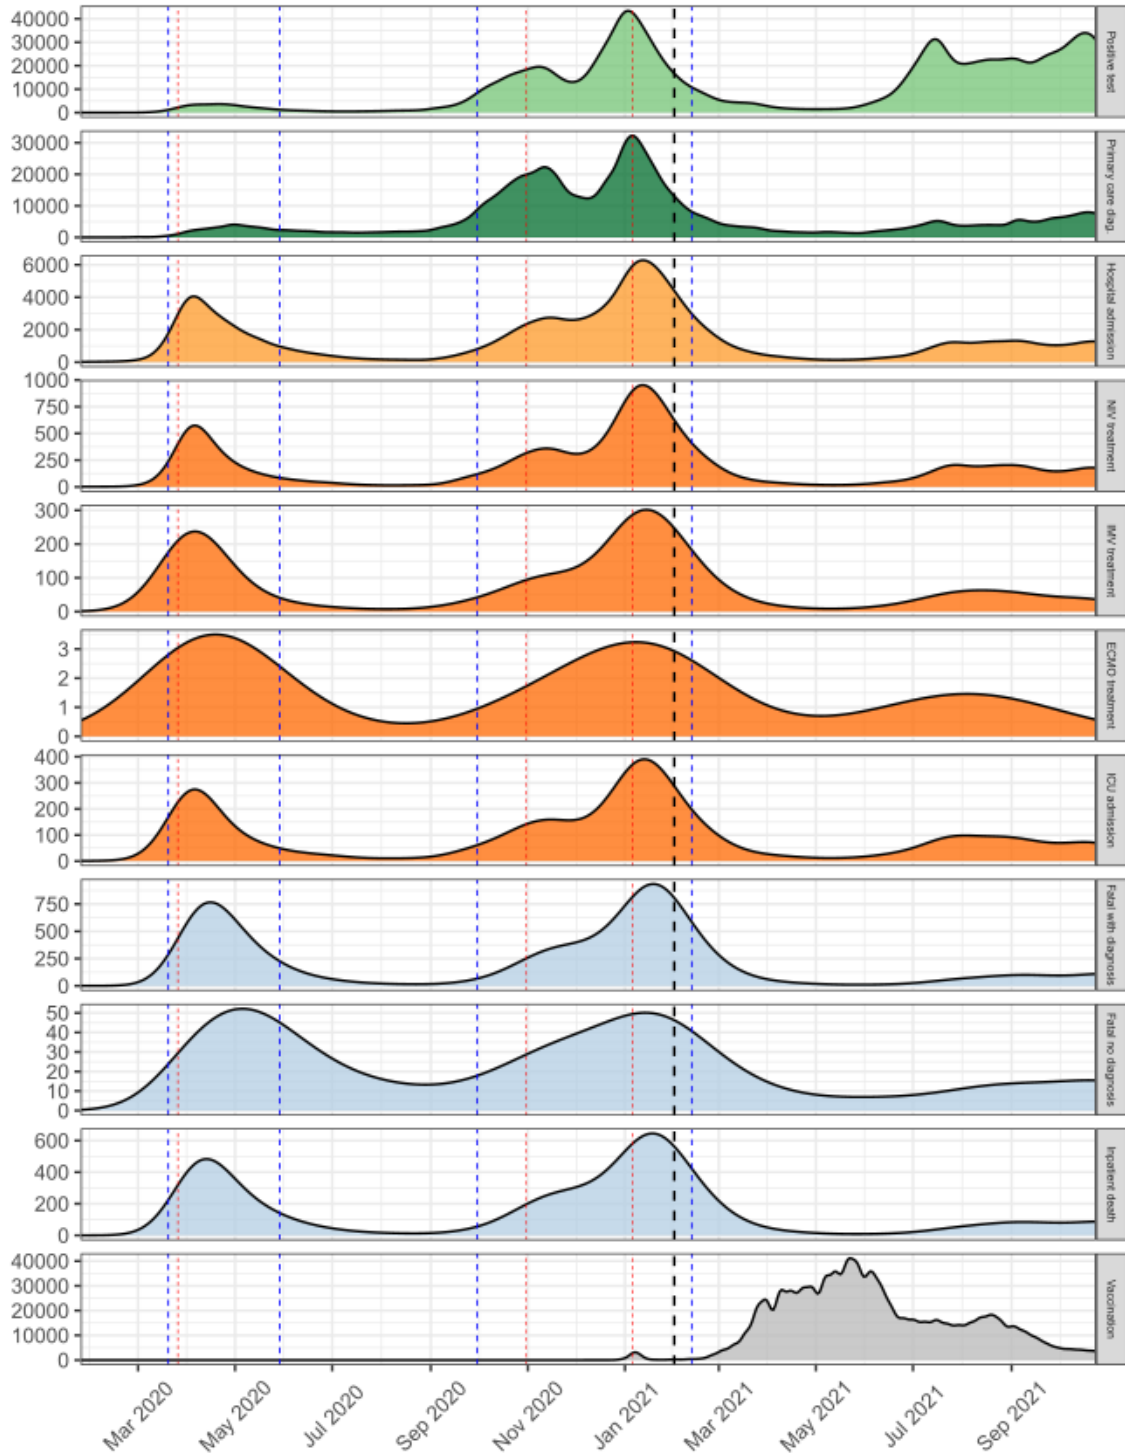

**Supplementary figure 3: Timeline of COVID-19 event phenotypes.**

Kernel density estimation plot showing unique events per individual per date, a person may have multiple events of the same type at different dates. Vaccination shows the date of the second dosage. Red vertical lines indicate the official English lockdown dates (26.03.2020, 31.10.2020 & 06.01.2021). Blue vertical lines indicate our study definition of wave 1 (20.03.2020 - 29.05.2020) and wave 2 (30.09.2020 - 12.02.2021). Black vertical line indicates the date used to explore the effects of vaccination on COVID-19 phenotypes.

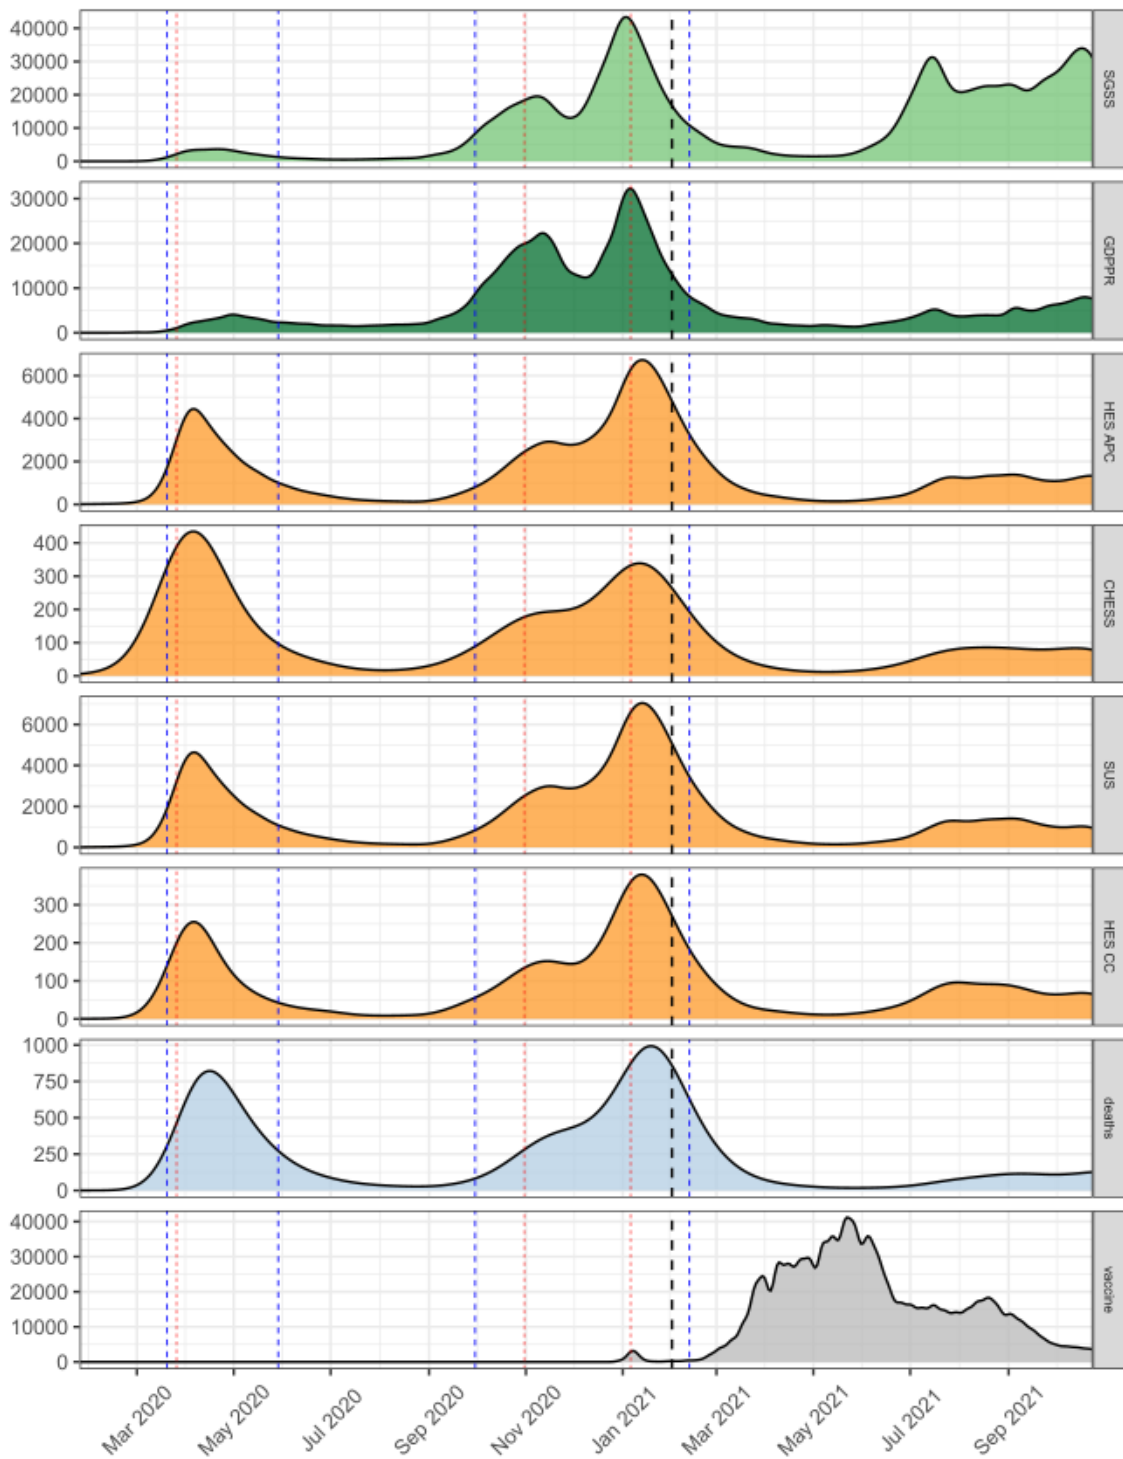

**Supplementary figure 4: Timeline plots showing COVID-19 events, stratified by data source.**

A person may have multiple events from the same source at different dates. Vaccination shows the date of the second dosage. Red vertical lines indicate the official English lockdown dates (26.03.2020, 31.10.2020 &

06.01.2021). Blue vertical lines indicate our study definition of wave 1 (20.03.2020 - 29.05.2020) and wave 2 (30.09.2020 - 12.02.2021). Black vertical line indicates the date used to explore the effects of vaccination on COVID-19 phenotypes.

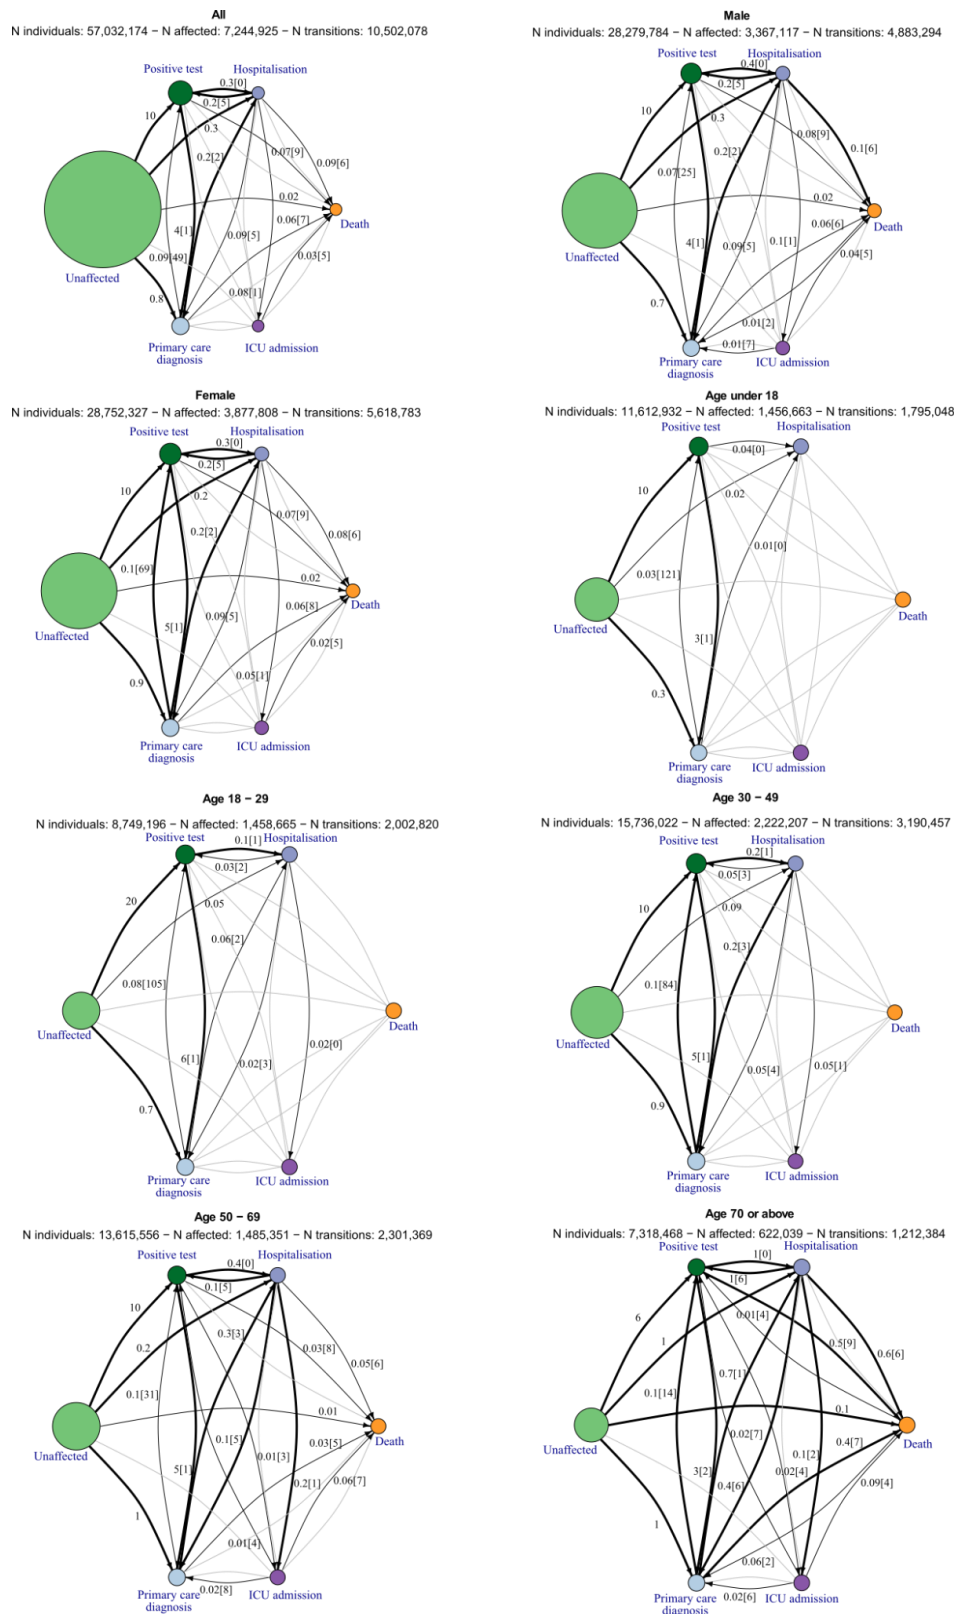

**Supplementary figure 5: COVID-19 trajectory networks by gender and age groups.** Networks show percentage of individuals transitioning and the median number of days passing between severity phenotypes stratified on sex and age groups. The size of the circles represent the number of individuals with that

event relative to the total study population size of 57 million. Numbers on arrows are the percentage of individuals with the given transition (relative to N individuals in the group) and in square brackets median days between events across all individuals with that transition. Median days between unaffected and other severity phenotypes are larger, as these represent days from study start and the particular event. Thick arrows represent transitions occurring in  $\geq 0.1\%$ . Thin black arrows represent transitions occurring in  $\geq 0.01\%$ . Any transitions occurring in fewer than  $0.01\%$  are not shown. N affected = N individuals with COVID-19.

Supplementary Material - COVID-19 trajectories among 57 million adults in England: a cohort study using electronic health records

**Ethnicity white**  
N individuals: 45,800,803 - N affected: 5,898,279 - N transitions: 8,475,206

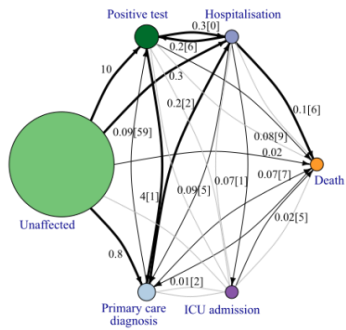

**Ethnicity Black or Black British**  
N individuals: 2,209,984 - N affected: 241,053 - N transitions: 364,963

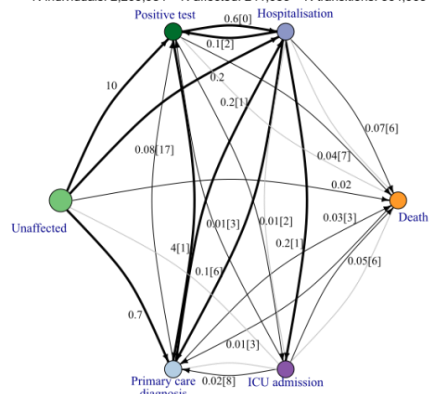

**Ethnicity Asian or Asian British**  
N individuals: 4,962,875 - N affected: 714,168 - N transitions: 1,107,886

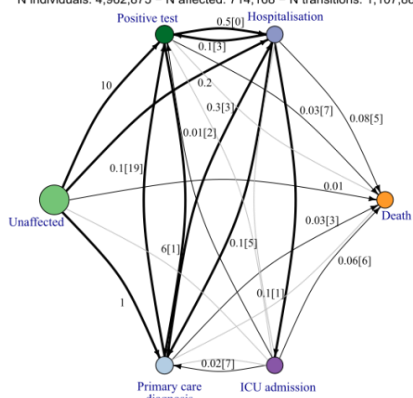

**Ethnicity Chinese**  
N individuals: 518,709 - N affected: 21,758 - N transitions: 31,129

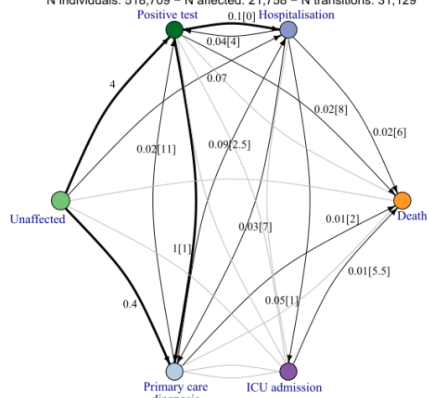

**Ethnicity mixed**  
N individuals: 1,224,101 - N affected: 153,693 - N transitions: 213,944

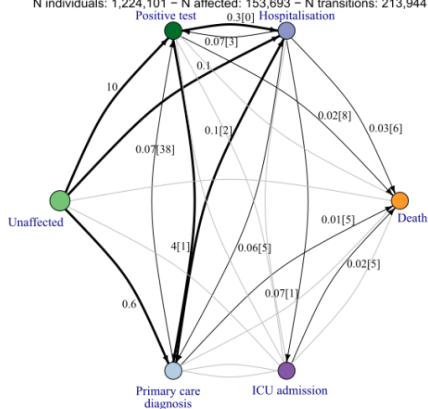

**Ethnicity Other**  
N individuals: 1,213,559 - N affected: 126,040 - N transitions: 186,645

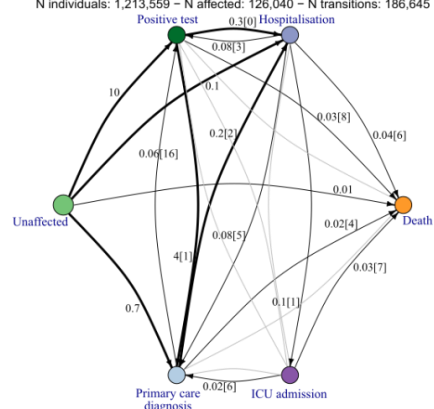

**IMD quintile 1**  
N individuals: 11,762,185 - N affected: 1,607,009 - N transitions: 2,398,034

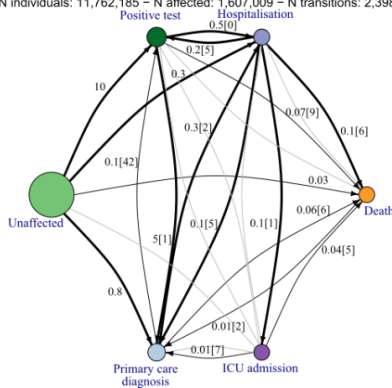

**IMD quintile 5**  
N individuals: 10,910,882 - N affected: 1,334,226 - N transitions: 1,875,786

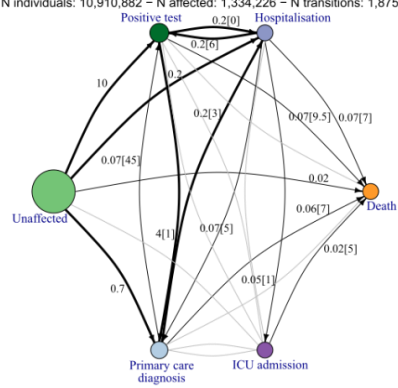

**Supplementary figure 6: COVID-19 trajectory networks by ethnicity and IMD.**

Networks show percentage of individuals transitioning and the median number of days passing between severity phenotypes stratified on sex and age groups. The size of the circles represent the number of individuals with that event relative to the total study population size of 57 million. Numbers on arrows are the percentage of individuals with the given transition (relative to N individuals in the group) and in square brackets median days between events across all individuals with that transition. Median days between unaffected and other severity phenotypes are larger, as these represent days from study start and the particular event. Thick arrows represent transitions occurring in  $\geq 0.1\%$ . Thin black arrows represent transitions occurring in  $\geq 0.01\%$ . Any transitions occurring in fewer than 0.01% are not shown. N affected = N individuals with COVID-19.

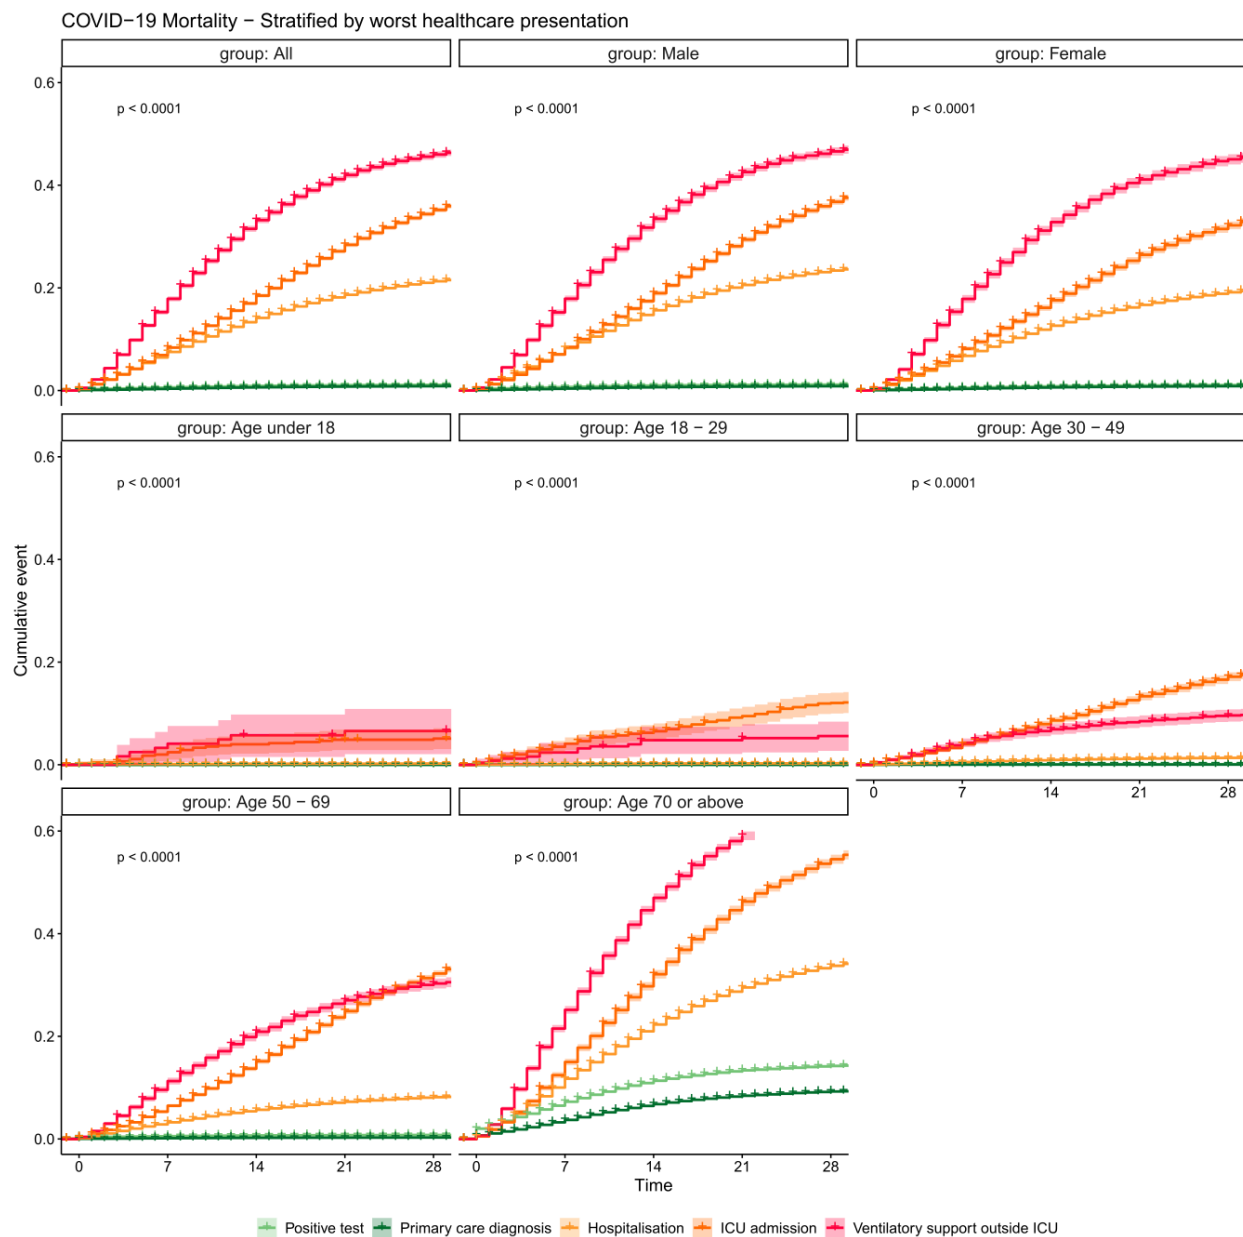

**Supplementary figure 7: Kaplan Meier plot of COVID-19 mortality by gender and age groups.**

Curves are stratified by worst healthcare presentation, here listed in increasing order of severity; positive test (light green), primary care diagnosis (dark green), hospitalisation (yellow), ICU admission (orange) and ventilatory

support outside ICU (red). Note the ICU admission group does not include patients who received ventilatory support outside of ICU wards. Shaded areas represent 95% confidence intervals in all panels.

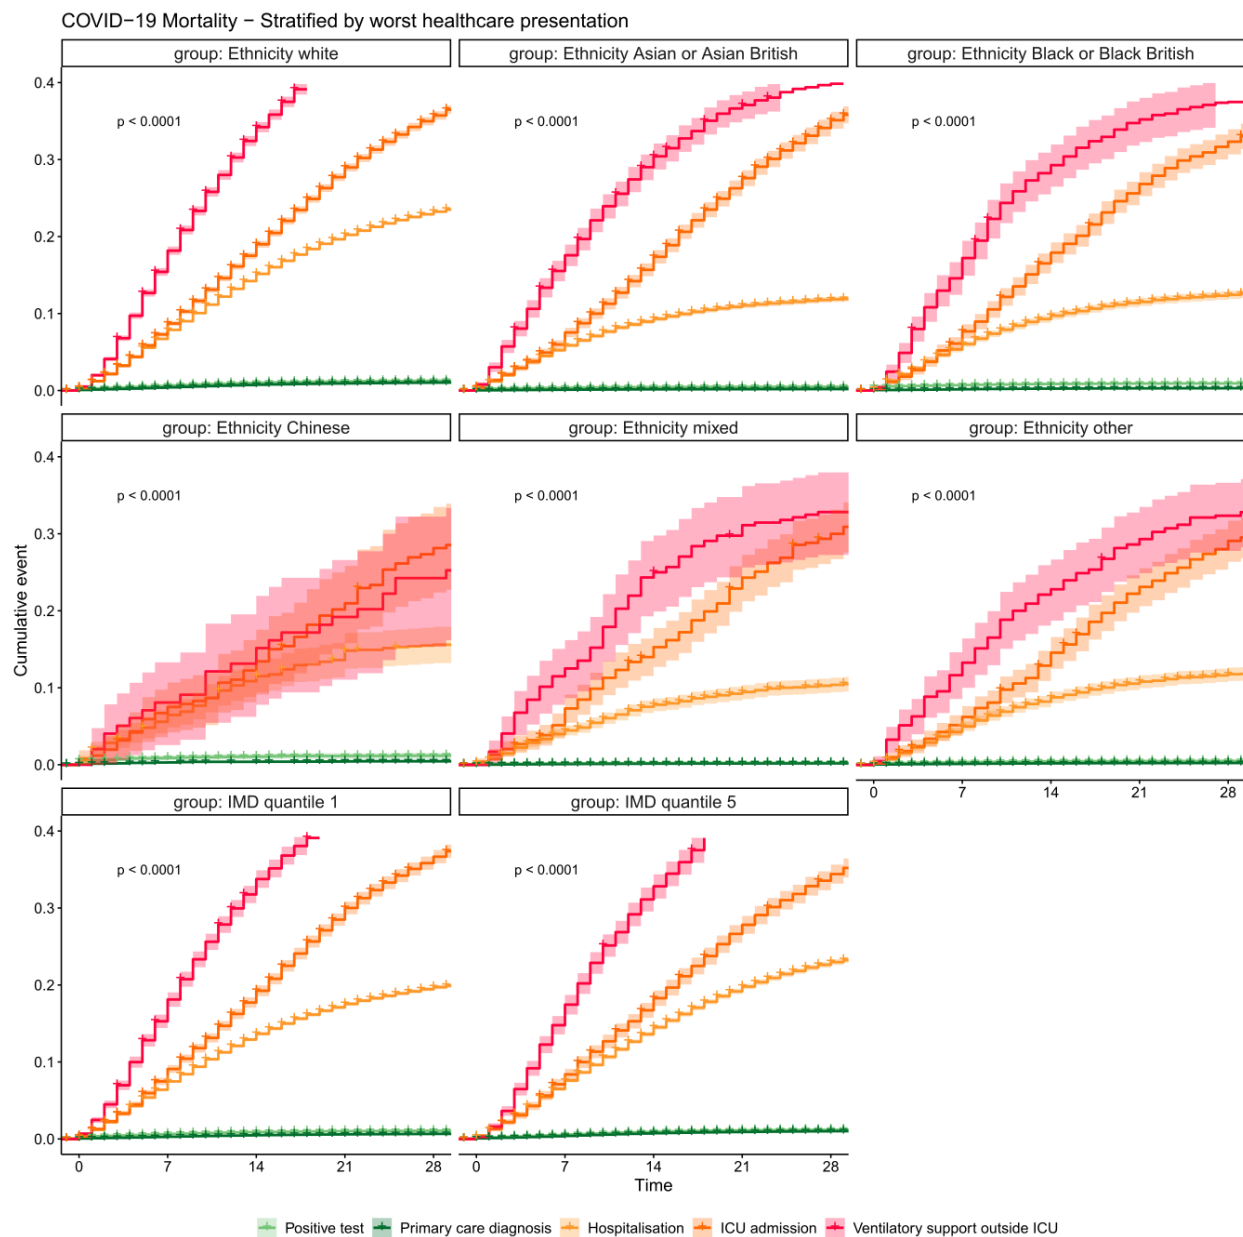

**Supplementary figure 8: Kaplan Meier plot of COVID-19 mortality by ethnicity and IMD level.**

Curves are stratified by worst healthcare presentation, here listed in increasing order of severity; positive test (light green), primary care diagnosis (dark green), hospitalisation (yellow), ICU admission (orange) and ventilatory support outside ICU (red). Note the ICU admission group does not include patients who received ventilatory support outside of ICU wards. Shaded areas represent 95% confidence intervals in all panels.



## Supplementary Tables

**Supplementary table 1: Number of individuals identified from each data source stratified by COVID-19 event and as total individuals across all data sources.**

Date ranges shown for all included data sources after filtering as per cohort definition (see Figure 1). “Death without diagnosis” refers to patients that died within 28 days of a COVID-related event where COVID-19 was not the recorded cause of death on the death certificate.

| Data                    | SGSS       | GDPPR      | HES APC    | SUS        | CHES       | HES CC     | Deaths     | Total      |
|-------------------------|------------|------------|------------|------------|------------|------------|------------|------------|
| Min. Date               | 2020-01-24 | 2020-01-23 | 2020-01-23 | 2020-01-23 | 2020-01-23 | 2020-01-28 | 2020-01-30 | 2020-01-23 |
| Max. Date               | 2021-11-30 | 2021-11-30 | 2021-11-30 | 2021-11-24 | 2021-11-30 | 2021-11-30 | 2021-11-30 | 2021-11-30 |
| Positive test           | 6,778,342  |            |            |            |            |            |            | 6,778,342  |
| GP diagnosis            |            | 3,056,132  |            |            |            |            |            | 3,056,132  |
| Hospitalisation         |            |            | 448,302    | 447,118    | 63,091     |            |            | 460,737    |
| ECMO treatment          |            |            | 561        | 646        | 366        |            |            | 696        |
| ICU admission           |            |            |            |            | 18,349     | 46,098     |            | 48,847     |
| IMV treatment           |            |            | 19,599     | 19,279     | 8,732      | 22,431     |            | 25,928     |
| NIV treatment           |            |            | 54,012     | 53,236     | 14,946     | 35,377     |            | 69,090     |
| Inpatient Death         |            |            | 96,511     | 97,583     |            |            |            | 99,938     |
| Fatal with diagnosis    |            |            |            |            |            |            | 139,818    | 139,818    |
| Death without diagnosis |            |            |            |            |            |            | 15,486     | 15,486     |

**Supplementary table 2: COVID-19 codes & frequencies.**

Codes appearing with a frequency <5 are masked as ‘<5’ to protect privacy.

| COVID-19 Event         | Code             | Terminology | Description                                                                                                                               | Source | n       |
|------------------------|------------------|-------------|-------------------------------------------------------------------------------------------------------------------------------------------|--------|---------|
| 01_Covid_positive_test |                  |             |                                                                                                                                           | SGSS   | 7135843 |
| 01_GP_covid_diagnosis  | 1240581000000104 | SNOMED      | Severe acute respiratory syndrome coronavirus 2 ribonucleic acid detected (finding)                                                       | GDPPR  | 2304566 |
| 01_GP_covid_diagnosis  | 1300721000000109 | SNOMED      | Coronavirus disease 19 caused by severe acute respiratory syndrome coronavirus 2 confirmed by laboratory test (situation)                 | GDPPR  | 718451  |
| 01_GP_covid_diagnosis  | 1008541000000105 | SNOMED      | Coronavirus ribonucleic acid detection assay (observable entity)                                                                          | GDPPR  | 435378  |
| 01_GP_covid_diagnosis  | 1321541000000108 | SNOMED      | Severe acute respiratory syndrome coronavirus 2 immunoglobulin G detected (finding)                                                       | GDPPR  | 330333  |
| 01_GP_covid_diagnosis  | 1240751000000100 | SNOMED      | Coronavirus disease 19 caused by severe acute respiratory syndrome coronavirus 2 (disorder)                                               | GDPPR  | 195948  |
| 01_GP_covid_diagnosis  | 1322781000000102 | SNOMED      | Severe acute respiratory syndrome coronavirus 2 antigen detection result positive (finding)                                               | GDPPR  | 96279   |
| 01_GP_covid_diagnosis  | 186747009        | SNOMED      | Coronavirus infection (disorder)                                                                                                          | GDPPR  | 61017   |
| 01_GP_covid_diagnosis  | 1300681000000102 | SNOMED      | Assessment using coronavirus disease 19 severity scale (procedure)                                                                        | GDPPR  | 38523   |
| 01_GP_covid_diagnosis  | 1300731000000106 | SNOMED      | Coronavirus disease 19 caused by severe acute respiratory syndrome coronavirus 2 confirmed using clinical diagnostic criteria (situation) | GDPPR  | 34344   |
| 01_GP_covid_diagnosis  | 1240511000000106 | SNOMED      | Detection of severe acute respiratory syndrome coronavirus 2 using polymerase chain reaction technique (procedure)                        | GDPPR  | 25087   |
| 01_GP_covid_diagnosis  | 1240741000000103 | SNOMED      | Severe acute respiratory syndrome coronavirus 2 serology (observable entity)                                                              | GDPPR  | 14850   |
| 01_GP_covid_diagnosis  | 1240551000000105 | SNOMED      | Pneumonia caused by severe acute respiratory syndrome coronavirus 2 (disorder)                                                            | GDPPR  | 13221   |
| 01_GP_covid_diagnosis  | 1321761000000103 | SNOMED      | Severe acute respiratory syndrome coronavirus 2 immunoglobulin A detected (finding)                                                       | GDPPR  | 8269    |

Supplementary Material - COVID-19 trajectories among 57 million adults in England: a cohort study using electronic health records

|                       |                  |        |                                                                                                                                                       |       |      |
|-----------------------|------------------|--------|-------------------------------------------------------------------------------------------------------------------------------------------------------|-------|------|
| 01_GP_covid_diagnosis | 1322871000000109 | SNOMED | Severe acute respiratory syndrome coronavirus 2 antibody detection result positive (finding)                                                          | GDPPR | 6683 |
| 01_GP_covid_diagnosis | 1300631000000101 | SNOMED | Coronavirus disease 19 severity score (observable entity)                                                                                             | GDPPR | 6179 |
| 01_GP_covid_diagnosis | 1240541000000107 | SNOMED | Infection of upper respiratory tract caused by severe acute respiratory syndrome coronavirus 2 (disorder)                                             | GDPPR | 4568 |
| 01_GP_covid_diagnosis | 1300671000000104 | SNOMED | Coronavirus disease 19 severity scale (assessment scale)                                                                                              | GDPPR | 2822 |
| 01_GP_covid_diagnosis | 1029481000000103 | SNOMED | Coronavirus nucleic acid detection assay (observable entity)                                                                                          | GDPPR | 2737 |
| 01_GP_covid_diagnosis | 1321551000000106 | SNOMED | Severe acute respiratory syndrome coronavirus 2 immunoglobulin M detected (finding)                                                                   | GDPPR | 2423 |
| 01_GP_covid_diagnosis | 1240401000000105 | SNOMED | Antibody to severe acute respiratory syndrome coronavirus 2 (substance)                                                                               | GDPPR | 634  |
| 01_GP_covid_diagnosis | 1240571000000101 | SNOMED | Gastroenteritis caused by severe acute respiratory syndrome coronavirus 2 (disorder)                                                                  | GDPPR | 350  |
| 01_GP_covid_diagnosis | 1240421000000101 | SNOMED | Serotype severe acute respiratory syndrome coronavirus 2 (qualifier value)                                                                            | GDPPR | 298  |
| 01_GP_covid_diagnosis | 1240531000000103 | SNOMED | Myocarditis caused by severe acute respiratory syndrome coronavirus 2 (disorder)                                                                      | GDPPR | 236  |
| 01_GP_covid_diagnosis | 1321341000000103 | SNOMED | Arbitrary concentration of severe acute respiratory syndrome coronavirus 2 immunoglobulin G in serum (observable entity)                              | GDPPR | 208  |
| 01_GP_covid_diagnosis | 1240391000000107 | SNOMED | Antigen of severe acute respiratory syndrome coronavirus 2 (substance)                                                                                | GDPPR | 163  |
| 01_GP_covid_diagnosis | 1321331000000107 | SNOMED | Arbitrary concentration of severe acute respiratory syndrome coronavirus 2 total immunoglobulin in serum (observable entity)                          | GDPPR | 134  |
| 01_GP_covid_diagnosis | 1321301000000101 | SNOMED | Severe acute respiratory syndrome coronavirus 2 ribonucleic acid qualitative existence in specimen (observable entity)                                | GDPPR | 122  |
| 01_GP_covid_diagnosis | 1240561000000108 | SNOMED | Encephalopathy caused by severe acute respiratory syndrome coronavirus 2 (disorder)                                                                   | GDPPR | 83   |
| 01_GP_covid_diagnosis | 1321351000000100 | SNOMED | Arbitrary concentration of severe acute respiratory syndrome coronavirus 2 immunoglobulin M in serum (observable entity)                              | GDPPR | 25   |
| 01_GP_covid_diagnosis | 1321241000000105 | SNOMED | Cardiomyopathy caused by severe acute respiratory syndrome coronavirus 2 (disorder)                                                                   | GDPPR | 23   |
| 01_GP_covid_diagnosis | 1240521000000100 | SNOMED | Otitis media caused by severe acute respiratory syndrome coronavirus 2 (disorder)                                                                     | GDPPR | 21   |
| 01_GP_covid_diagnosis | 1321321000000105 | SNOMED | Severe acute respiratory syndrome coronavirus 2 immunoglobulin G qualitative existence in specimen (observable entity)                                | GDPPR | 16   |
| 01_GP_covid_diagnosis | 1321311000000104 | SNOMED | Severe acute respiratory syndrome coronavirus 2 immunoglobulin M qualitative existence in specimen (observable entity)                                | GDPPR | 11   |
| 01_GP_covid_diagnosis | 1240411000000107 | SNOMED | Ribonucleic acid of severe acute respiratory syndrome coronavirus 2 (substance)                                                                       | GDPPR | 8    |
| 01_GP_covid_diagnosis | 120814005        | SNOMED | Coronavirus antibody (substance)                                                                                                                      | GDPPR | <5   |
| 01_GP_covid_diagnosis | 1321811000000105 | SNOMED | Severe acute respiratory syndrome coronavirus 2 immunoglobulin A qualitative existence in specimen (observable entity)                                | GDPPR | <5   |
| 01_GP_covid_diagnosis | 1321201000000107 | SNOMED | Coronavirus disease 19 caused by severe acute respiratory syndrome coronavirus 2 health issues simple reference set (foundation metadata concept)     | GDPPR | <5   |
| 01_GP_covid_diagnosis | 1321181000000108 | SNOMED | Coronavirus disease 19 caused by severe acute respiratory syndrome coronavirus 2 record extraction simple reference set (foundation metadata concept) | GDPPR | <5   |
| 01_GP_covid_diagnosis | 1240381000000105 | SNOMED | Severe acute respiratory syndrome coronavirus 2 (organism)                                                                                            | GDPPR | <5   |
| 01_GP_covid_diagnosis | 1321801000000108 | SNOMED | Arbitrary concentration of severe acute respiratory syndrome coronavirus 2 immunoglobulin A in serum (observable entity)                              | GDPPR | <5   |

Supplementary Material - COVID-19 trajectories among 57 million adults in England: a cohort study using electronic health records

|                                  |                  |        |                                                                                                                                                |         |        |
|----------------------------------|------------------|--------|------------------------------------------------------------------------------------------------------------------------------------------------|---------|--------|
| 01_GP_covid_diagnosis            | 1321191000000105 | SNOMED | Coronavirus disease 19 caused by severe acute respiratory syndrome coronavirus 2 procedures simple reference set (foundation metadata concept) | GDPPR   | <5     |
| 02_Covid_admission               | U07.1            | ICD10  | Confirmed_COVID19                                                                                                                              | HES APC | 826227 |
| 02_Covid_admission               | U07.1            | ICD10  | Confirmed_COVID19                                                                                                                              | SUS     | 820696 |
| 02_Covid_admission               | U07.2            | ICD10  | Suspected_COVID19                                                                                                                              | SUS     | 69207  |
| 02_Covid_admission               |                  |        | HospitalAdmissionDate IS NOT null                                                                                                              | CHESS   | 67029  |
| 02_Covid_admission               | U07.2            | ICD10  | Suspected_COVID19                                                                                                                              | HES APC | 64124  |
| 03_ECMO_treatment                | X58.1            | OPCS   | Extracorporeal membrane oxygenation                                                                                                            | SUS     | 736    |
| 03_ECMO_treatment                | X58.1            | OPCS   | Extracorporeal membrane oxygenation                                                                                                            | HES APC | 629    |
| 03_ECMO_treatment                |                  |        | RespiratorySupportECMO == Yes                                                                                                                  | CHESS   | 439    |
| 03_ICU_admission                 |                  |        | id is in hes_cc table                                                                                                                          | HES CC  | 57338  |
| 03_ICU_admission                 |                  |        | DateAdmittedICU IS NOT null                                                                                                                    | CHESS   | 19629  |
| 03_IMV_treatment                 |                  |        | ARESSUPDAYS > 0                                                                                                                                | HES CC  | 27555  |
| 03_IMV_treatment                 | E85.1            | OPCS   | Invasive ventilation                                                                                                                           | SUS     | 21737  |
| 03_IMV_treatment                 | E85.1            | OPCS   | Invasive ventilation                                                                                                                           | HES APC | 21696  |
| 03_IMV_treatment                 |                  |        | Invasivemechanicalventilation == Yes                                                                                                           | CHESS   | 9572   |
| 03_IMV_treatment                 | X56              | OPCS   | Intubation of trachea                                                                                                                          | SUS     | 520    |
| 03_IMV_treatment                 | X56              | OPCS   | Intubation of trachea                                                                                                                          | HES APC | 498    |
| 03_NIV_treatment                 | E85.6            | OPCS   | Continuous positive airway pressure                                                                                                            | HES APC | 47095  |
| 03_NIV_treatment                 | E85.6            | OPCS   | Continuous positive airway pressure                                                                                                            | SUS     | 46150  |
| 03_NIV_treatment                 |                  |        | bressupdays > 0                                                                                                                                | HES CC  | 40273  |
| 03_NIV_treatment                 | E85.2            | OPCS   | Non-invasive ventilation NEC                                                                                                                   | SUS     | 20912  |
| 03_NIV_treatment                 | E85.2            | OPCS   | Non-invasive ventilation NEC                                                                                                                   | HES APC | 20052  |
| 03_NIV_treatment                 |                  |        | Highflownasaloxxygen OR NoninvasiveMechanicalventilation == Yes                                                                                | CHESS   | 15243  |
| 04_Covid_inpatient_death         |                  |        | DISCHARGE_METHOD_HOSPITAL_PROVIDER_SPELL = 4 (Died)                                                                                            | SUS     | 99247  |
| 04_Covid_inpatient_death         |                  |        | DISMETH = 4 (Died)                                                                                                                             | HES APC | 96481  |
| 04_Covid_inpatient_death         |                  |        | DISCHARGE_DESTINATION_HOSPITAL_PROVIDER_SPELL = 79 (Not applicable - PATIENT died or still birth)                                              | SUS     | 169    |
| 04_Covid_inpatient_death         |                  |        | DISDEST = 79 (Not applicable - PATIENT died or still birth)                                                                                    | HES APC | 122    |
| 04_Fatal_with_covid_diagnosis    | U071             | ICD10  |                                                                                                                                                | deaths  | 137636 |
| 04_Fatal_with_covid_diagnosis    | U072             | ICD10  |                                                                                                                                                | deaths  | 4052   |
| 04_Fatal_without_covid_diagnosis |                  |        | ONS death within 28 days                                                                                                                       | deaths  | 15489  |

**Supplementary table 3: 270 CALIBER phenotypes, aggregated into 16 categories**

Table shows the number of individuals within the study cohort identified from GPPR (SNOMED-CT) and HES APC (ICD-10, OPCS-4).

| Category                           | Phenotype                                                          | Individuals |
|------------------------------------|--------------------------------------------------------------------|-------------|
| Benign neoplasm/CIN                | Benign neoplasm of colon rectum anus and anal canal                | 132,843     |
| Benign neoplasm/CIN                | Benign neoplasm of ovary                                           | 95,700      |
| Benign neoplasm/CIN                | Benign neoplasm and polyp of uterus                                | 49,834      |
| Benign neoplasm/CIN                | Benign neoplasm of stomach and duodenum                            | 37,515      |
| Benign neoplasm/CIN                | Haemangioma any site                                               | 20,943      |
| Benign neoplasm/CIN                | Carcinoma in situ cervical                                         | 8,605       |
| Benign neoplasm/CIN                | Benign neoplasm of brain and other parts of central nervous system | 4,255       |
| Cancers                            | Myelodysplastic syndromes                                          | 534,599     |
| Cancers                            | Primary malignancy other organs                                    | 439,688     |
| Cancers                            | Primary malignancy other skin and subcutaneous tissue              | 423,906     |
| Cancers                            | Primary malignancy breast                                          | 174,836     |
| Cancers                            | Primary malignancy cervical                                        | 85,510      |
| Cancers                            | Primary malignancy prostate                                        | 28,726      |
| Cancers                            | Primary malignancy colorectal and anus                             | 20,521      |
| Cancers                            | Primary malignancy malignant melanoma                              | 16,639      |
| Cancers                            | Non-hodgkin lymphoma                                               | 12,737      |
| Cancers                            | Secondary malignancy other organs                                  | 10,425      |
| Cancers                            | Leukaemia                                                          | 9,904       |
| Cancers                            | Primary malignancy bladder                                         | 9,738       |
| Cancers                            | Monoclonal gammopathy of undetermined significance                 | 9,229       |
| Cancers                            | Hodgkin lymphoma                                                   | 9,070       |
| Cancers                            | Multiple myeloma and malignant plasma cell neoplasms               | 7,521       |
| Cancers                            | Primary malignancy lung and trachea                                | 5,796       |
| Cancers                            | Secondary malignancy bone                                          | 5,510       |
| Cancers                            | Primary malignancy kidney and ureter                               | 5,134       |
| Cancers                            | Primary malignancy testicular                                      | 4,684       |
| Cancers                            | Primary malignancy uterine                                         | 4,249       |
| Cancers                            | Secondary malignancy lung                                          | 3,979       |
| Cancers                            | Secondary malignancy liver and intrahepatic bile duct              | 3,618       |
| Cancers                            | Primary malignancy ovarian                                         | 3,520       |
| Cancers                            | Primary malignancy oro-pharyngeal                                  | 3,297       |
| Cancers                            | Primary malignancy thyroid                                         | 3,144       |
| Cancers                            | Polycythaemia vera                                                 | 3,138       |
| Cancers                            | Secondary malignancy retroperitoneum and peritoneum                | 2,140       |
| Cancers                            | Primary malignancy brain other CNS and intracranial                | 1,609       |
| Cancers                            | Primary malignancy oesophageal                                     | 1,412       |
| Cancers                            | Secondary malignancy lymph nodes                                   | 1,255       |
| Cancers                            | Primary malignancy liver                                           | 1,071       |
| Cancers                            | Secondary malignancy brain other CNS and intracranial              | 991         |
| Cancers                            | Primary malignancy stomach                                         | 965         |
| Cancers                            | Secondary malignancy pleura                                        | 722         |
| Cancers                            | Primary malignancy bone and articular cartilage                    | 671         |
| Cancers                            | Primary malignancy pancreatic                                      | 653         |
| Cancers                            | Secondary malignancy bowel                                         | 528         |
| Cancers                            | Primary malignancy biliary tract                                   | 397         |
| Cancers                            | Secondary malignancy adrenal gland                                 | 382         |
| Cancers                            | Primary malignancy mesothelioma                                    | 88          |
| Cancers                            | Primary malignancy multiple independent sites                      | 9           |
| Diseases of the circulatory system | Hypertension                                                       | 856,557     |

Supplementary Material - COVID-19 trajectories among 57 million adults in England: a cohort study using electronic health records

|                                    |                                                     |         |
|------------------------------------|-----------------------------------------------------|---------|
| Diseases of the circulatory system | Coronary heart disease not otherwise specified      | 224,719 |
| Diseases of the circulatory system | Stable angina                                       | 152,989 |
| Diseases of the circulatory system | Atrial fibrillation                                 | 139,086 |
| Diseases of the circulatory system | Myocardial infarction                               | 122,024 |
| Diseases of the circulatory system | Heart failure                                       | 77,189  |
| Diseases of the circulatory system | Stroke NOS                                          | 65,937  |
| Diseases of the circulatory system | Transient ischaemic attack                          | 64,896  |
| Diseases of the circulatory system | Ischaemic stroke                                    | 59,096  |
| Diseases of the circulatory system | Peripheral arterial disease                         | 57,162  |
| Diseases of the circulatory system | Unstable angina                                     | 56,033  |
| Diseases of the circulatory system | Supraventricular tachycardia                        | 43,127  |
| Diseases of the circulatory system | Venous thromboembolic disease excluding PE          | 34,362  |
| Diseases of the circulatory system | Right bundle branch block                           | 32,120  |
| Diseases of the circulatory system | Left bundle branch block                            | 26,332  |
| Diseases of the circulatory system | Atrioventricular block first degree                 | 22,559  |
| Diseases of the circulatory system | Abdominal aortic aneurysm                           | 17,123  |
| Diseases of the circulatory system | Raynaud's syndrome                                  | 13,716  |
| Diseases of the circulatory system | Other cardiomyopathy                                | 10,541  |
| Diseases of the circulatory system | Pericardial effusion noninflammatory                | 10,040  |
| Diseases of the circulatory system | Secondary pulmonary hypertension                    | 9,934   |
| Diseases of the circulatory system | Atrioventricular block complete                     | 9,216   |
| Diseases of the circulatory system | Ventricular tachycardia                             | 8,598   |
| Diseases of the circulatory system | Intracerebral haemorrhage                           | 8,015   |
| Diseases of the circulatory system | Dilated cardiomyopathy                              | 7,001   |
| Diseases of the circulatory system | Atrioventricular block second degree                | 6,784   |
| Diseases of the circulatory system | Sick sinus syndrome                                 | 5,579   |
| Diseases of the circulatory system | Primary pulmonary hypertension                      | 4,457   |
| Diseases of the circulatory system | Subdural haematoma - nontraumatic                   | 4,188   |
| Diseases of the circulatory system | Hypertrophic cardiomyopathy                         | 2,858   |
| Diseases of the circulatory system | Bifascicular block                                  | 2,441   |
| Diseases of the circulatory system | Trifascicular block                                 | 2,438   |
| Diseases of the circulatory system | Subarachnoid haemorrhage                            | 1,094   |
| Diseases of the circulatory system | Pulmonary embolism                                  | 616     |
| Diseases of the circulatory system | Rheumatic valve disease                             | 206     |
| Diseases of the digestive system   | Abdominal hernia                                    | 208,656 |
| Diseases of the digestive system   | Appendicitis                                        | 126,466 |
| Diseases of the digestive system   | Oesophagitis and oesophageal ulcer                  | 113,970 |
| Diseases of the digestive system   | Cholecystitis                                       | 86,338  |
| Diseases of the digestive system   | Fatty liver                                         | 43,473  |
| Diseases of the digestive system   | Anal fissure                                        | 32,084  |
| Diseases of the digestive system   | Coeliac disease                                     | 30,898  |
| Diseases of the digestive system   | Peritonitis                                         | 29,371  |
| Diseases of the digestive system   | Barretts oesophagus                                 | 26,380  |
| Diseases of the digestive system   | Anorectal fistula                                   | 21,208  |
| Diseases of the digestive system   | Liver fibrosis sclerosis and cirrhosis              | 17,773  |
| Diseases of the digestive system   | Pancreatitis                                        | 10,946  |
| Diseases of the digestive system   | Anorectal prolapse                                  | 10,900  |
| Diseases of the digestive system   | Cholangitis                                         | 10,375  |
| Diseases of the digestive system   | Gastro-oesophageal reflux disease                   | 8,512   |
| Diseases of the digestive system   | Portal hypertension                                 | 7,961   |
| Diseases of the digestive system   | Volvulus                                            | 6,271   |
| Diseases of the digestive system   | Autoimmune liver disease                            | 4,763   |
| Diseases of the digestive system   | Angiodysplasia of colon                             | 4,507   |
| Diseases of the digestive system   | Oesophageal varices                                 | 3,868   |
| Diseases of the digestive system   | Diaphragmatic hernia                                | 3,464   |
| Diseases of the digestive system   | Alcoholic liver disease                             | 2,988   |
| Diseases of the digestive system   | Peptic ulcer disease                                | 2,038   |
| Diseases of the digestive system   | Hepatic failure                                     | 2,031   |
| Diseases of the digestive system   | Diverticular disease of intestine acute and chronic | 316     |
| Diseases of the ear                | Hearing loss                                        | 8,566   |
| Diseases of the ear                | Tinnitus                                            | 7,785   |
| Diseases of the ear                | Meniere disease                                     | 5,628   |
| Diseases of the endocrine system   | Diabetes                                            | 410,730 |

Supplementary Material - COVID-19 trajectories among 57 million adults in England: a cohort study using electronic health records

|                                         |                                                             |           |
|-----------------------------------------|-------------------------------------------------------------|-----------|
| Diseases of the endocrine system        | Obesity                                                     | 344,462   |
| Diseases of the endocrine system        | Hypo or hyperthyroidism                                     | 272,744   |
| Diseases of the endocrine system        | Polycystic ovarian syndrome                                 | 44,632    |
| Diseases of the endocrine system        | Syndrome of inappropriate secretion of antidiuretic hormone | 31,000    |
| Diseases of the endocrine system        | Hyperparathyroidism                                         | 10,251    |
| Diseases of the endocrine system        | Cystic fibrosis                                             | 1,829     |
| Diseases of the eye                     | Diabetic ophthalmic complications                           | 295,315   |
| Diseases of the eye                     | Cataract                                                    | 236,092   |
| Diseases of the eye                     | Glaucoma                                                    | 45,545    |
| Diseases of the eye                     | Macular degeneration                                        | 41,547    |
| Diseases of the eye                     | Retinal detachments and breaks                              | 25,472    |
| Diseases of the eye                     | Ptosis of eyelid                                            | 12,169    |
| Diseases of the eye                     | Anterior and intermediate uveitis                           | 5,325     |
| Diseases of the eye                     | Keratitis                                                   | 901       |
| Diseases of the eye                     | Scleritis and episcleritis                                  | 703       |
| Diseases of the eye                     | Posterior uveitis                                           | 455       |
| Diseases of the eye                     | Retinal vascular occlusions                                 | 167       |
| Diseases of the eye                     | Visual impairment and blindness                             | 79        |
| Diseases of the genitourinary system    | Menorrhagia and polymenorrhoea                              | 145,324   |
| Diseases of the genitourinary system    | Acute kidney injury                                         | 134,152   |
| Diseases of the genitourinary system    | Urolithiasis                                                | 94,047    |
| Diseases of the genitourinary system    | Obstructive and reflux uropathy                             | 48,394    |
| Diseases of the genitourinary system    | Urinary incontinence                                        | 47,483    |
| Diseases of the genitourinary system    | Postmenopausal bleeding                                     | 34,839    |
| Diseases of the genitourinary system    | Hydrocoele including infected                               | 32,140    |
| Diseases of the genitourinary system    | Dysmenorrhoea                                               | 29,075    |
| Diseases of the genitourinary system    | Glomerulonephritis                                          | 24,413    |
| Diseases of the genitourinary system    | End stage renal disease                                     | 23,596    |
| Diseases of the genitourinary system    | Postcoital and contact bleeding                             | 22,840    |
| Diseases of the genitourinary system    | Endometrial hyperplasia and hypertrophy                     | 21,708    |
| Diseases of the genitourinary system    | Non-acute cystitis                                          | 8,645     |
| Diseases of the genitourinary system    | Erectile dysfunction                                        | 4,017     |
| Diseases of the genitourinary system    | Tubulo-interstitial nephritis                               | 2,149     |
| Diseases of the genitourinary system    | Undescended testicle                                        | 72        |
| Diseases of the genitourinary system    | Male infertility                                            | 30        |
| Diseases of the respiratory system      | Asthma                                                      | 1,078,007 |
| Diseases of the respiratory system      | Allergic and chronic rhinitis                               | 137,547   |
| Diseases of the respiratory system      | COPD                                                        | 122,793   |
| Diseases of the respiratory system      | Chronic sinusitis                                           | 113,255   |
| Diseases of the respiratory system      | Sleep apnoea                                                | 76,997    |
| Diseases of the respiratory system      | Pulmonary collapse excluding pneumothorax                   | 43,196    |
| Diseases of the respiratory system      | Hypertrophy of nasal turbinates                             | 34,629    |
| Diseases of the respiratory system      | Bronchiectasis                                              | 26,741    |
| Diseases of the respiratory system      | Aspiration pneumonitis                                      | 16,550    |
| Diseases of the respiratory system      | Other interstitial pulmonary diseases with fibrosis         | 14,342    |
| Diseases of the respiratory system      | Pleural plaque                                              | 8,299     |
| Diseases of the respiratory system      | Respiratory failure                                         | 2,580     |
| Diseases of the respiratory system      | Asbestosis                                                  | 1,108     |
| Diseases of the respiratory system      | Pleural effusion                                            | 117       |
| Diseases of the respiratory system      | Pneumothorax                                                | 46        |
| Diseases of the respiratory system      | Nasal polyp                                                 | 0         |
| Haematological immunological conditions | Secondary or other thrombocytopaenia                        | 22,495    |
| Haematological immunological conditions | Splenomegaly                                                | 16,652    |
| Haematological immunological conditions | Sickle-cell trait                                           | 10,840    |
| Haematological immunological conditions | Thalassaemia trait                                          | 9,113     |
| Haematological immunological conditions | Primary or idiopathic thrombocytopaenia                     | 7,652     |
| Haematological immunological conditions | Hyposplenism                                                | 7,470     |
| Haematological immunological conditions | Thrombophilia                                               | 6,333     |
| Haematological immunological conditions | Thalassaemia                                                | 5,678     |
| Haematological immunological conditions | Agranulocytosis                                             | 5,375     |
| Haematological immunological conditions | Sickle-cell anaemia                                         | 4,718     |
| Haematological immunological conditions | Secondary polycythaemia                                     | 3,844     |

Supplementary Material - COVID-19 trajectories among 57 million adults in England: a cohort study using electronic health records

|                                         |                                                                   |           |
|-----------------------------------------|-------------------------------------------------------------------|-----------|
| Haematological immunological conditions | Immunodeficiencies                                                | 3,800     |
| Haematological immunological conditions | Aplastic anaemias                                                 | 3,299     |
| Haematological immunological conditions | Sarcoidosis                                                       | 2,633     |
| Haematological immunological conditions | Other haemolytic anaemias                                         | 629       |
| Haematological immunological conditions | Other anaemias                                                    | 252       |
| Haematological immunological conditions | Iron deficiency anaemia                                           | 96        |
| Haematological immunological conditions | Vitamin B12 deficiency anaemia                                    | <5        |
| Infectious diseases                     | Other or unspecified infectious organisms                         | 440,614   |
| Infectious diseases                     | HIV                                                               | 421,121   |
| Infectious diseases                     | Bacterial diseases excluding TB                                   | 367,531   |
| Infectious diseases                     | Urinary tract infections                                          | 299,209   |
| Infectious diseases                     | Viral diseases excluding chronic hepatitis hiv                    | 183,208   |
| Infectious diseases                     | Infections of other or unspecified organs                         | 101,009   |
| Infectious diseases                     | Lower respiratory tract infections                                | 70,990    |
| Infectious diseases                     | Infection of other or unspecified genitourinary system            | 37,861    |
| Infectious diseases                     | Infection of skin and subcutaneous tissues                        | 34,607    |
| Infectious diseases                     | Infections of the digestive system                                | 27,563    |
| Infectious diseases                     | Eye infections                                                    | 17,540    |
| Infectious diseases                     | Other nervous system infections                                   | 14,355    |
| Infectious diseases                     | Infection of male genital system                                  | 13,697    |
| Infectious diseases                     | Infections of the heart                                           | 6,659     |
| Infectious diseases                     | Infection of anal and rectal regions                              | 6,630     |
| Infectious diseases                     | Infection of bones and joints                                     | 6,425     |
| Infectious diseases                     | Infection of liver                                                | 5,151     |
| Infectious diseases                     | Meningitis                                                        | 3,917     |
| Infectious diseases                     | Chronic viral hepatitis                                           | 3,893     |
| Infectious diseases                     | Septicaemia                                                       | 3,631     |
| Infectious diseases                     | Ear and upper respiratory tract infections                        | 3,389     |
| Infectious diseases                     | Parasitic infections                                              | 2,997     |
| Infectious diseases                     | Mycoses                                                           | 2,927     |
| Infectious diseases                     | Tuberculosis                                                      | 1,796     |
| Infectious diseases                     | Encephalitis                                                      | 888       |
| Infectious diseases                     | Rheumatic fever                                                   | 363       |
| Mental health disorders                 | Depression                                                        | 1,151,654 |
| Mental health disorders                 | Bipolar affective disorder and mania                              | 710,688   |
| Mental health disorders                 | Anxiety disorders                                                 | 479,657   |
| Mental health disorders                 | Other psychoactive substance misuse                               | 228,296   |
| Mental health disorders                 | Alcohol problems                                                  | 157,548   |
| Mental health disorders                 | Dementia                                                          | 101,527   |
| Mental health disorders                 | Intellectual disability                                           | 79,640    |
| Mental health disorders                 | Autism and aspergers syndrome                                     | 60,595    |
| Mental health disorders                 | Hyperkinetic disorders                                            | 41,197    |
| Mental health disorders                 | Schizophrenia schizotypal and delusional disorders                | 33,377    |
| Mental health disorders                 | Anorexia and bulimia nervosa                                      | 5,812     |
| Mental health disorders                 | Personality disorders                                             | 279       |
| Mental health disorders                 | Delirium not induced by alcohol and other psychoactive substances | 86        |
| Musculoskeletal conditions              | Osteoporosis                                                      | 99,307    |
| Musculoskeletal conditions              | Spondylosis                                                       | 94,560    |
| Musculoskeletal conditions              | Fracture of wrist                                                 | 86,411    |
| Musculoskeletal conditions              | Carpal tunnel syndrome                                            | 81,606    |
| Musculoskeletal conditions              | Enthesopathies synovial disorders                                 | 71,593    |
| Musculoskeletal conditions              | Fracture of hip                                                   | 45,259    |
| Musculoskeletal conditions              | Rheumatoid arthritis                                              | 42,069    |
| Musculoskeletal conditions              | Spinal stenosis                                                   | 41,694    |
| Musculoskeletal conditions              | Intervertebral disc disorders                                     | 29,904    |
| Musculoskeletal conditions              | Polymyalgia rheumatica                                            | 16,747    |
| Musculoskeletal conditions              | Fibromatoses                                                      | 14,523    |
| Musculoskeletal conditions              | Spondylolisthesis                                                 | 13,928    |
| Musculoskeletal conditions              | Collapsed vertebra                                                | 12,101    |
| Musculoskeletal conditions              | Psoriatic arthropathy                                             | 8,309     |
| Musculoskeletal conditions              | Giant cell arteritis                                              | 4,170     |

Supplementary Material - COVID-19 trajectories among 57 million adults in England: a cohort study using electronic health records

|                            |                                                                             |         |
|----------------------------|-----------------------------------------------------------------------------|---------|
| Musculoskeletal conditions | Sjogrens disease                                                            | 4,154   |
| Musculoskeletal conditions | Enteropathic arthropathy                                                    | 829     |
| Musculoskeletal conditions | Gout                                                                        | 67      |
| Musculoskeletal conditions | Systemic sclerosis                                                          | 21      |
| Musculoskeletal conditions | Lupus erythematosus local and systemic                                      | <5      |
| Neurological conditions    | Epilepsy                                                                    | 92,492  |
| Neurological conditions    | Postviral fatigue syndrome neurasthenia and fibromyalgia                    | 54,819  |
| Neurological conditions    | Peripheral neuropathies excluding cranial nerve and carpal tunnel syndromes | 41,829  |
| Neurological conditions    | Diabetic neurological complications                                         | 32,170  |
| Neurological conditions    | Parkinson's disease                                                         | 15,819  |
| Neurological conditions    | Bell's palsy                                                                | 13,461  |
| Neurological conditions    | Intracranial hypertension                                                   | 5,993   |
| Neurological conditions    | Disorders of autonomic nervous system                                       | 5,228   |
| Neurological conditions    | Trigeminal neuralgia                                                        | 4,860   |
| Neurological conditions    | Essential tremor                                                            | 3,876   |
| Neurological conditions    | Myasthenia gravis                                                           | 2,415   |
| Neurological conditions    | Motor neuron disease                                                        | 1,299   |
| Perinatal conditions       | Slow foetal growth or low birth weight                                      | 88,030  |
| Perinatal conditions       | Prematurity                                                                 | 53,323  |
| Perinatal conditions       | Congenital malformations of cardiac septa                                   | 32,115  |
| Perinatal conditions       | High birth weight                                                           | 26,102  |
| Perinatal conditions       | Post-term infant                                                            | 14,760  |
| Perinatal conditions       | Patent ductus arteriosus                                                    | 9,274   |
| Perinatal conditions       | Downs syndrome                                                              | 4,341   |
| Perinatal conditions       | Intrauterine hypoxia                                                        | 3,992   |
| Perinatal conditions       | Spina bifida                                                                | 1,777   |
| Skin conditions            | Dermatitis atopc contact other unspecified                                  | 154,275 |
| Skin conditions            | Pilonidal cyst sinus                                                        | 30,120  |
| Skin conditions            | Actinic keratosis                                                           | 15,970  |
| Skin conditions            | Psoriasis                                                                   | 7,992   |
| Skin conditions            | Hidradenitis suppurativa                                                    | 5,717   |
| Skin conditions            | Acne                                                                        | 3,696   |
| Skin conditions            | Rosacea                                                                     | 2,343   |
| Skin conditions            | Lichen planus                                                               | 108     |
| Skin conditions            | Seborrheic dermatitis                                                       | <5      |



**Supplementary table 4: Demographic overview of deceased patients**

Table is stratified by individuals identified with or without a formal COVID-19 diagnosis listed on the death certificate, and/or COVID-19 inpatient deaths, as compared with the total population of all patients with a COVID-19 event.

|                                 | Fatal with<br>COVID-19 as<br>cause | Fatal without<br>COVID-19 as<br>cause | COVID-19<br>Inpatient death | COVID-19 Death<br>no hospital<br>contact | COVID-19<br>Death no<br>hospital contact<br>- Wave 1 | COVID-19<br>Death no<br>hospital contact<br>- Wave 2 | All COVID<br>events |
|---------------------------------|------------------------------------|---------------------------------------|-----------------------------|------------------------------------------|------------------------------------------------------|------------------------------------------------------|---------------------|
| n                               | 139818 (1.9)                       | 15486 (0.2)                           | 99938 (1.4)                 | 43814 (0.6)                              | 16203 (6.4)                                          | 19677 (0.7)                                          | 7244925 (100)       |
| <b>Sex</b>                      |                                    |                                       |                             |                                          |                                                      |                                                      |                     |
| Female                          | 63247 (45.2)                       | 7456 (48.1)                           | 40913 (40.9)                | 23970 (54.7)                             | 8772 (54.1)                                          | 11370 (57.8)                                         | 3877807 (53.5)      |
| Unknown                         | 0 (0)                              | 0 (0)                                 | 0 (0)                       | 0 (0)                                    | 0 (0)                                                | 0 (0)                                                | 0 (0)               |
| <b>Age</b>                      |                                    |                                       |                             |                                          |                                                      |                                                      |                     |
| Under 18                        | 44 (0)                             | 26 (0.2)                              | 49 (0)                      | 27 (0.1)                                 | 6 (0)                                                | 12 (0.1)                                             | 1456663 (20.1)      |
| Age 18 - 29                     | 237 (0.2)                          | 52 (0.3)                              | 197 (0.2)                   | 101 (0.2)                                | 25 (0.2)                                             | 36 (0.2)                                             | 1458665 (20.1)      |
| Age 30 - 49                     | 3060 (2.2)                         | 466 (3)                               | 2426 (2.4)                  | 987 (2.3)                                | 215 (1.3)                                            | 433 (2.2)                                            | 2222207 (30.7)      |
| Age 50 - 69                     | 21830 (15.6)                       | 2444 (15.8)                           | 18436 (18.4)                | 4749 (10.8)                              | 1274 (7.9)                                           | 2038 (10.4)                                          | 1485351 (20.5)      |
| >= 70                           | 114647 (82)                        | 12498 (80.7)                          | 78830 (78.9)                | 37950 (86.6)                             | 14683 (90.6)                                         | 17158 (87.2)                                         | 622039 (8.6)        |
| Unknown                         | 0 (0)                              | 0 (0)                                 | 0 (0)                       | 0 (0)                                    | 0 (0)                                                | 0 (0)                                                | 0 (0)               |
| <b>Ethnicity</b>                |                                    |                                       |                             |                                          |                                                      |                                                      |                     |
| White                           | 121864 (87.2)                      | 14190 (91.6)                          | 85533 (85.6)                | 39909 (91.1)                             | 14856 (91.7)                                         | 17931 (91.1)                                         | 5898279 (81.4)      |
| Asian or asian british          | 9726 (7)                           | 684 (4.4)                             | 8071 (8.1)                  | 1794 (4.1)                               | 500 (3.1)                                            | 879 (4.5)                                            | 714168 (9.9)        |
| Black or black british          | 4372 (3.1)                         | 299 (1.9)                             | 3446 (3.4)                  | 1018 (2.3)                               | 402 (2.5)                                            | 424 (2.2)                                            | 241053 (3.3)        |
| Chinese                         | 342 (0.2)                          | 30 (0.2)                              | 262 (0.3)                   | 100 (0.2)                                | 42 (0.3)                                             | 37 (0.2)                                             | 21758 (0.3)         |
| Mixed and others                | 2507 (1.8)                         | 198 (1.3)                             | 1995 (2)                    | 577 (1.3)                                | 250 (1.5)                                            | 219 (1.1)                                            | 279733 (3.9)        |
| Unknown ethnicity               | 1007 (0.7)                         | 85 (0.5)                              | 631 (0.6)                   | 416 (0.9)                                | 153 (0.9)                                            | 187 (1)                                              | 89934 (1.2)         |
| <b>IMD Fifths (%)</b>           |                                    |                                       |                             |                                          |                                                      |                                                      |                     |
| 1 (most deprived)               | 33397 (23.9)                       | 3574 (23.1)                           | 25202 (25.2)                | 8909 (20.3)                              | 3359 (20.7)                                          | 3802 (19.3)                                          | 1607009 (22.2)      |
| 5 (least deprived)              | 23024 (16.5)                       | 2713 (17.5)                           | 15533 (15.5)                | 8333 (19)                                | 3180 (19.6)                                          | 3874 (19.7)                                          | 1334226 (18.4)      |
| Unknown                         | 120 (0.1)                          | 15 (0.1)                              | 62 (0.1)                    | 57 (0.1)                                 | 25 (0.2)                                             | 23 (0.1)                                             | 5272 (0.1)          |
| <b>COVID-19 events</b>          |                                    |                                       |                             |                                          |                                                      |                                                      |                     |
| COVID-19 positive test          | 120326 (86.1)                      | 6580 (42.5)                           | 90154 (90.2)                | 26486 (60.5)                             | 6321 (39)                                            | 15730 (79.9)                                         | 6778342 (93.6)      |
| GP COVID-19 diagnosis           | 55176 (39.5)                       | 6059 (39.1)                           | 33564 (33.6)                | 20903 (47.7)                             | 5899 (36.4)                                          | 11247 (57.2)                                         | 3056132 (42.2)      |
| COVID-19 admission              | 102913 (73.6)                      | 8579 (55.4)                           | 99920 (100)                 | 0 (0)                                    | 0 (0)                                                | 0 (0)                                                | 460737 (6.4)        |
| ICU admission                   | 17833 (12.8)                       | 722 (4.7)                             | 18465 (18.5)                | 0 (0)                                    | 0 (0)                                                | 0 (0)                                                | 48847 (0.7)         |
| NIV treatment                   | 26895 (19.2)                       | 895 (5.8)                             | 27442 (27.5)                | 0 (0)                                    | 0 (0)                                                | 0 (0)                                                | 69090 (1)           |
| IMV treatment                   | 12879 (9.2)                        | 490 (3.2)                             | 13459 (13.5)                | 0 (0)                                    | 0 (0)                                                | 0 (0)                                                | 25928 (0.4)         |
| ECMO treatment                  | 246 (0.2)                          | 1 (0)                                 | 254 (0.3)                   | 0 (0)                                    | 0 (0)                                                | 0 (0)                                                | 696 (0)             |
| Fatal with COVID-19 as cause    | 139818 (100)                       | 0 (0)                                 | 91164 (91.2)                | 36904 (84.2)                             | 15000 (92.6)                                         | 17128 (87)                                           | 139818 (1.9)        |
| Fatal without COVID-19 as cause | 0 (0)                              | 15486 (100)                           | 6058 (6.1)                  | 6907 (15.8)                              | 1201 (7.4)                                           | 2549 (13)                                            | 15486 (0.2)         |
| COVID-19 inpatient death        | 91164 (65.2)                       | 6058 (39.1)                           | 99938 (100)                 | 17 (0)                                   | 15 (0.1)                                             | 0 (0)                                                | 99938 (1.4)         |

**Supplementary table 5: Primary diagnosis on death certificate for deceased patients**

Table shows the top ten most frequent primary diagnosis on the death certificate after removal of duplicates (defined as entries with the same ID, date and underlying cause of death) and registrations with a null underlying cause of death for the 139,818 individuals with COVID-19 on the death certificate, and 15,486 dying without COVID-19 on the death certificate within 28 days of a COVID-19 event.

| COVID on the death certificate |                                |                | Without COVID on the death certificate |                                       |             |
|--------------------------------|--------------------------------|----------------|----------------------------------------|---------------------------------------|-------------|
| ICD10                          | Description                    | N (%)          | ICD10                                  | Description                           | N (%)       |
| U071                           | COVID-19, virus identified     | 121897 (87.2%) | F03                                    | Unspecified dementia                  | 1008 (6.5%) |
| U072                           | COVID-19, virus not identified | 3529 (2.5%)    | C349                                   | Cancer of bronchus and lung           | 809 (5.2%)  |
| F03                            | Unspecified dementia           | 1336 (1%)      | J189                                   | Pneumonia                             | 794 (5.1%)  |
| I259                           | Chronic ischemic heart disease | 832 (0.6%)     | I259                                   | Chronic ischemic heart disease        | 525 (3.4%)  |
| C349                           | Cancer of bronchus and lung    | 786 (0.6%)     | J440                                   | Chronic obstructive pulmonary disease | 495 (3.2%)  |
| I64                            | Stroke                         | 732 (0.5%)     | I64                                    | Stroke                                | 490 (3.2%)  |
| G309                           | Alzheimer's disease            | 710 (0.5%)     | G309                                   | Alzheimer's disease                   | 444 (2.9%)  |
| I219                           | Acute myocardial infarction    | 634 (0.5%)     | I219                                   | Acute myocardial infarction           | 431 (2.8%)  |
| F019                           | Dementia                       | 552 (0.4%)     | C61                                    | Malignant neoplasm of prostate        | 348 (2.2%)  |
| W19                            | Unspecified fall               | 411 (0.3%)     | F019                                   | Dementia                              | 341 (2.2%)  |

**Supplementary Table 6: Primary diagnoses of COVID-19 hospitalisations identified from HES APC**

Table shows the top 10 most common primary diagnoses in hospitalisations identified from HES APC with COVID-19 at any diagnostic position. Primary diagnosis is defined as the diagnosis appearing in the primary position for the first episode in a patient's hospital admission. A total of 3,726 unique ICD-10 codes were identified in primary position in the first episode of a COVID-19 admission.

| ICD-10 Code | Description                                 | Episodes | Individuals | % individuals |
|-------------|---------------------------------------------|----------|-------------|---------------|
| U071        | COVID-19, virus identified                  | 252,599  | 252,088     | 56.6          |
| U072        | COVID-19, virus not identified              | 20,572   | 20,530      | 4.6           |
| N390        | Urinary tract infection, site not specified | 5,578    | 5,566       | 1.3           |
| A419        | Sepsis, unspecified                         | 4,953    | 4,944       | 1.1           |
| J181        | Lobar pneumonia, unspecified                | 4,633    | 4,627       | 1             |
| R296        | Tendency to fall, not elsewhere classified  | 4,491    | 4,481       | 1             |
| S720        | Fracture of neck of femur                   | 3,750    | 3,735       | 0.8           |
| N179        | Acute renal failure, unspecified            | 3,556    | 3,542       | 0.8           |
| R69X        | Unknown and unspecified causes of morbidity | 3,190    | 3,178       | 0.7           |
| I500        | Congestive heart failure                    | 3,114    | 3,108       | 0.7           |

\*U072 is intended for use when COVID-19 is diagnosed clinically or epidemiologically but laboratory testing is inconclusive or not available

# RECORD Statement

The Reporting of studies Conducted using Observational Routinely-collected Data (RECORD) statement – checklist of items, extended from the STROBE statement, that should be reported in observational studies using routinely collected health data.

|                           | Item No. | STROBE items                                                                                                                                                                               | Location in manuscript where items are reported | RECORD items                                                                                                                                                                                                                                                                                                                                                                                                                                       | Location in manuscript where items are reported                                        |
|---------------------------|----------|--------------------------------------------------------------------------------------------------------------------------------------------------------------------------------------------|-------------------------------------------------|----------------------------------------------------------------------------------------------------------------------------------------------------------------------------------------------------------------------------------------------------------------------------------------------------------------------------------------------------------------------------------------------------------------------------------------------------|----------------------------------------------------------------------------------------|
| <b>Title and abstract</b> |          |                                                                                                                                                                                            |                                                 |                                                                                                                                                                                                                                                                                                                                                                                                                                                    |                                                                                        |
|                           | 1        | (a) Indicate the study’s design with a commonly used term in the title or the abstract (b) Provide in the abstract an informative and balanced summary of what was done and what was found | Abstract                                        | <p>RECORD 1.1: The type of data used should be specified in the title or abstract. When possible, the name of the databases used should be included.</p> <p>RECORD 1.2: If applicable, the geographic region and timeframe within which the study took place should be reported in the title or abstract.</p> <p>RECORD 1.3: If linkage between databases was conducted for the study, this should be clearly stated in the title or abstract.</p> | <p>Title &amp; Abstract/Design</p> <p>Abstract/Participants</p> <p>Abstract/Design</p> |
| <b>Introduction</b>       |          |                                                                                                                                                                                            |                                                 |                                                                                                                                                                                                                                                                                                                                                                                                                                                    |                                                                                        |
| Background rationale      | 2        | Explain the scientific background and rationale for the investigation being reported                                                                                                       | Introduction                                    |                                                                                                                                                                                                                                                                                                                                                                                                                                                    |                                                                                        |
| Objectives                | 3        | State specific objectives, including any prespecified hypotheses                                                                                                                           | Introduction/financial paragraph                |                                                                                                                                                                                                                                                                                                                                                                                                                                                    |                                                                                        |
| <b>Methods</b>            |          |                                                                                                                                                                                            |                                                 |                                                                                                                                                                                                                                                                                                                                                                                                                                                    |                                                                                        |
| Study Design              | 4        | Present key elements of study design early in the paper                                                                                                                                    | Method/Study design and EHR data sources        |                                                                                                                                                                                                                                                                                                                                                                                                                                                    |                                                                                        |
| Setting                   | 5        | Describe the setting, locations, and relevant dates, including periods of recruitment, exposure, follow-up, and data collection                                                            | Methods/Design, Population                      |                                                                                                                                                                                                                                                                                                                                                                                                                                                    |                                                                                        |

|                              |   |                                                                                                                                                                                                                                                                                                                                                                                                                                                                                                                                                                                                                                                                                                                              |                                                |                                                                                                                                                                                                                                                                                                                                                                                                                                                                                                                                                                                                                                                                                                      |                                                                                                                                                                                                                                                                                                                                                                                                             |
|------------------------------|---|------------------------------------------------------------------------------------------------------------------------------------------------------------------------------------------------------------------------------------------------------------------------------------------------------------------------------------------------------------------------------------------------------------------------------------------------------------------------------------------------------------------------------------------------------------------------------------------------------------------------------------------------------------------------------------------------------------------------------|------------------------------------------------|------------------------------------------------------------------------------------------------------------------------------------------------------------------------------------------------------------------------------------------------------------------------------------------------------------------------------------------------------------------------------------------------------------------------------------------------------------------------------------------------------------------------------------------------------------------------------------------------------------------------------------------------------------------------------------------------------|-------------------------------------------------------------------------------------------------------------------------------------------------------------------------------------------------------------------------------------------------------------------------------------------------------------------------------------------------------------------------------------------------------------|
| Participants                 | 6 | <p>(a) <i>Cohort study</i> - Give the eligibility criteria, and the sources and methods of selection of participants. Describe methods of follow-up</p> <p><i>Case-control study</i> - Give the eligibility criteria, and the sources and methods of case ascertainment and control selection. Give the rationale for the choice of cases and controls</p> <p><i>Cross-sectional study</i> - Give the eligibility criteria, and the sources and methods of selection of participants</p> <p>(b) <i>Cohort study</i> - For matched studies, give matching criteria and number of exposed and unexposed</p> <p><i>Case-control study</i> - For matched studies, give matching criteria and the number of controls per case</p> |                                                | <p>RECORD 6.1: The methods of study population selection (such as codes or algorithms used to identify subjects) should be listed in detail. If this is not possible, an explanation should be provided.</p> <p>RECORD 6.2: Any validation studies of the codes or algorithms used to select the population should be referenced. If validation was conducted for this study and not published elsewhere, detailed methods and results should be provided.</p> <p>RECORD 6.3: If the study involved linkage of databases, consider use of a flow diagram or other graphical display to demonstrate the data linkage process, including the number of individuals with linked data at each stage.</p> | <p><a href="#">Methods, Figure 1 &amp; 2, Supplementary Table 1, Github</a></p> <p><a href="#">Comorbidities: Wood et al. 2021, Kuan et al. 2019</a></p> <p><a href="#">Cross-EHR source concordance and consistency with established knowledge discussed</a></p> <p><a href="#">Flow diagram included of datasources, linkage provided by NHS-D and referenced, therefore not explicitly described</a></p> |
| Variables                    | 7 | Clearly define all outcomes, exposures, predictors, potential confounders, and effect modifiers. Give diagnostic criteria, if applicable.                                                                                                                                                                                                                                                                                                                                                                                                                                                                                                                                                                                    |                                                | RECORD 7.1: A complete list of codes and algorithms used to classify exposures, outcomes, confounders, and effect modifiers should be provided. If these cannot be reported, an explanation should be provided.                                                                                                                                                                                                                                                                                                                                                                                                                                                                                      | <a href="#">Methods, Supplementary Table 1, Github</a>                                                                                                                                                                                                                                                                                                                                                      |
| Data sources/<br>measurement | 8 | For each variable of interest, give sources of data and details of methods of assessment (measurement). Describe comparability of assessment methods if there is more than one group                                                                                                                                                                                                                                                                                                                                                                                                                                                                                                                                         | <a href="#">Methods, Supplementary Table 1</a> |                                                                                                                                                                                                                                                                                                                                                                                                                                                                                                                                                                                                                                                                                                      |                                                                                                                                                                                                                                                                                                                                                                                                             |

|                        |    |                                                                                                                                                                                                                                                                                                                                                                                                                |                                                                                                                                                                                                  |  |  |
|------------------------|----|----------------------------------------------------------------------------------------------------------------------------------------------------------------------------------------------------------------------------------------------------------------------------------------------------------------------------------------------------------------------------------------------------------------|--------------------------------------------------------------------------------------------------------------------------------------------------------------------------------------------------|--|--|
|                        |    |                                                                                                                                                                                                                                                                                                                                                                                                                | Cross-EHR source concordance shown in Figure 3 and Supplementary Figure 2. Temporal coherence in Figure 4 and Supplementary Figure 1                                                             |  |  |
| Bias                   | 9  | Describe any efforts to address potential sources of bias                                                                                                                                                                                                                                                                                                                                                      | Discussion                                                                                                                                                                                       |  |  |
| Study size             | 10 | Explain how the study size was arrived at                                                                                                                                                                                                                                                                                                                                                                      | Methods/Population, Figure 1                                                                                                                                                                     |  |  |
| Quantitative variables | 11 | Explain how quantitative variables were handled in the analyses. If applicable, describe which groupings were chosen, and why                                                                                                                                                                                                                                                                                  | Methods/Covariates & comorbidities<br><br><i>Added discretisation of Age</i>                                                                                                                     |  |  |
| Statistical methods    | 12 | (a) Describe all statistical methods, including those used to control for confounding<br>(b) Describe any methods used to examine subgroups and interactions<br>(c) Explain how missing data were addressed<br><br>(d) <i>Cohort study</i> - If applicable, explain how loss to follow-up was addressed<br><i>Case-control study</i> - If applicable, explain how matching of cases and controls was addressed | Methods/Statistical analyses.<br><br>No adjustment for confounding, discussed in discussion.<br><br>Number of missing data fields reported for all key variables<br><br>Follow up of 28 days for |  |  |

|                                  |    |                                                                                                                                                                                                                                                                                                                               |                                                                              |                                                                                                                                                                                                                                                                                                                         |                                                                                                            |
|----------------------------------|----|-------------------------------------------------------------------------------------------------------------------------------------------------------------------------------------------------------------------------------------------------------------------------------------------------------------------------------|------------------------------------------------------------------------------|-------------------------------------------------------------------------------------------------------------------------------------------------------------------------------------------------------------------------------------------------------------------------------------------------------------------------|------------------------------------------------------------------------------------------------------------|
|                                  |    | <p><i>Cross-sectional study</i> - If applicable, describe analytical methods taking account of sampling strategy<br/>(e) Describe any sensitivity analyses</p>                                                                                                                                                                | <p>pandemic wave analysis described in method<br/>NA</p> <p>NA</p> <p>NA</p> |                                                                                                                                                                                                                                                                                                                         |                                                                                                            |
| Data access and cleaning methods |    | ..                                                                                                                                                                                                                                                                                                                            |                                                                              | <p>RECORD 12.1: Authors should describe the extent to which the investigators had access to the database population used to create the study population.</p> <p>RECORD 12.2: Authors should provide information on the data cleaning methods used in the study.</p>                                                     | <p>Methods/Ethical &amp; regulatory approvals (Access)</p> <p>Cleaning -&gt; Github full analysis code</p> |
| Linkage                          |    | ..                                                                                                                                                                                                                                                                                                                            |                                                                              | <p>RECORD 12.3: State whether the study included person-level, institutional-level, or other data linkage across two or more databases. The methods of linkage and methods of linkage quality evaluation should be provided.</p>                                                                                        | Methods/Design                                                                                             |
| <b>Results</b>                   |    |                                                                                                                                                                                                                                                                                                                               |                                                                              |                                                                                                                                                                                                                                                                                                                         |                                                                                                            |
| Participants                     | 13 | <p>(a) Report the numbers of individuals at each stage of the study (<i>e.g.</i>, numbers potentially eligible, examined for eligibility, confirmed eligible, included in the study, completing follow-up, and analysed)<br/>(b) Give reasons for non-participation at each stage.<br/>(c) Consider use of a flow diagram</p> | Methods/Population, Figure 1                                                 | <p>RECORD 13.1: Describe in detail the selection of the persons included in the study (<i>i.e.</i>, study population selection) including filtering based on data quality, data availability and linkage. The selection of included persons can be described in the text and/or by means of the study flow diagram.</p> |                                                                                                            |
| Descriptive data                 | 14 | (a) Give characteristics of study participants ( <i>e.g.</i> , demographic, clinical,                                                                                                                                                                                                                                         | Results Table 1                                                              |                                                                                                                                                                                                                                                                                                                         |                                                                                                            |

|                   |    |                                                                                                                                                                                                                                                                                                                                                                                                                 |                                                                 |                                                                                                                                                                                                                                                                                                          |                                      |
|-------------------|----|-----------------------------------------------------------------------------------------------------------------------------------------------------------------------------------------------------------------------------------------------------------------------------------------------------------------------------------------------------------------------------------------------------------------|-----------------------------------------------------------------|----------------------------------------------------------------------------------------------------------------------------------------------------------------------------------------------------------------------------------------------------------------------------------------------------------|--------------------------------------|
|                   |    | social) and information on exposures and potential confounders<br>(b) Indicate the number of participants with missing data for each variable of interest<br>(c) <i>Cohort study</i> - summarise follow-up time (e.g., average and total amount)                                                                                                                                                                | Results Table 1<br><br>Results                                  |                                                                                                                                                                                                                                                                                                          |                                      |
| Outcome data      | 15 | <i>Cohort study</i> - Report numbers of outcome events or summary measures over time<br><i>Case-control study</i> - Report numbers in each exposure category, or summary measures of exposure<br><i>Cross-sectional study</i> - Report numbers of outcome events or summary measures                                                                                                                            | Results Table 1                                                 |                                                                                                                                                                                                                                                                                                          |                                      |
| Main results      | 16 | (a) Give unadjusted estimates and, if applicable, confounder-adjusted estimates and their precision (e.g., 95% confidence interval). Make clear which confounders were adjusted for and why they were included<br>(b) Report category boundaries when continuous variables were categorized<br>(c) If relevant, consider translating estimates of relative risk into absolute risk for a meaningful time period | Results; No adjustment for confounding, discussed in discussion |                                                                                                                                                                                                                                                                                                          |                                      |
| Other analyses    | 17 | Report other analyses done—e.g., analyses of subgroups and interactions, and sensitivity analyses                                                                                                                                                                                                                                                                                                               | Trajectory analysis reported in main results                    |                                                                                                                                                                                                                                                                                                          |                                      |
| <b>Discussion</b> |    |                                                                                                                                                                                                                                                                                                                                                                                                                 |                                                                 |                                                                                                                                                                                                                                                                                                          |                                      |
| Key results       | 18 | Summarise key results with reference to study objectives                                                                                                                                                                                                                                                                                                                                                        | Discussion                                                      |                                                                                                                                                                                                                                                                                                          |                                      |
| Limitations       | 19 | Discuss limitations of the study, taking into account sources of potential bias or imprecision. Discuss both direction and magnitude of any potential bias                                                                                                                                                                                                                                                      |                                                                 | RECORD 19.1: Discuss the implications of using data that were not created or collected to answer the specific research question(s). Include discussion of misclassification bias, unmeasured confounding, missing data, and changing eligibility over time, as they pertain to the study being reported. | Discussion/Strengths and limitations |

|                                                           |    |                                                                                                                                                                            |                                                                                         |                                                                                                                                                          |                                                                                                                                       |
|-----------------------------------------------------------|----|----------------------------------------------------------------------------------------------------------------------------------------------------------------------------|-----------------------------------------------------------------------------------------|----------------------------------------------------------------------------------------------------------------------------------------------------------|---------------------------------------------------------------------------------------------------------------------------------------|
| Interpretation                                            | 20 | Give a cautious overall interpretation of results considering objectives, limitations, multiplicity of analyses, results from similar studies, and other relevant evidence | <a href="#">Discussion/Comparison with previous findings, Strengths and limitations</a> |                                                                                                                                                          |                                                                                                                                       |
| Generalisability                                          | 21 | Discuss the generalisability (external validity) of the study results                                                                                                      | <a href="#">Discussion/Strengths and limitations</a>                                    |                                                                                                                                                          |                                                                                                                                       |
| <b>Other Information</b>                                  |    |                                                                                                                                                                            |                                                                                         |                                                                                                                                                          |                                                                                                                                       |
| Funding                                                   | 22 | Give the source of funding and the role of the funders for the present study and, if applicable, for the original study on which the present article is based              | <a href="#">Funding</a>                                                                 |                                                                                                                                                          |                                                                                                                                       |
| Accessibility of protocol, raw data, and programming code |    | ..                                                                                                                                                                         |                                                                                         | RECORD 22.1: Authors should provide information on how to access any supplemental information such as the study protocol, raw data, or programming code. | <a href="#">Full analysis code available on GitHub.</a><br><a href="#">Protocols available via CVD-COVID-UK consortium home page.</a> |

\*Reference: Benchimol EI, Smeeth L, Guttman A, Harron K, Moher D, Petersen I, Sørensen HT, von Elm E, Langan SM, the RECORD Working Committee. The Reporting of studies Conducted using Observational Routinely-collected health Data (RECORD) Statement. *PLoS Medicine* 2015; in press.

\*Checklist is protected under Creative Commons Attribution ([CC BY](#)) license.



## Supplementary references

- 1 General Practice Extraction Service (GPES) Data for pandemic planning and research: a guide for analysts and users of the data. NHS Digital. <https://digital.nhs.uk/coronavirus/gpes-data-for-pandemic-planning-and-research/guide-for-analysts-and-users-of-the-data> (accessed Jan 20, 2022).
- 2 Herrett E, Thomas SL, Schoonen WM, Smeeth L, Hall AJ. Validation and validity of diagnoses in the General Practice Research Database: a systematic review. *Br J Clin Pharmacol* 2010; **69**: 4–14.
- 3 Department of Health and Social Care. Payment by Results in the NHS: a simple guide. GOV.UK. 2013; published online March 25. <https://www.gov.uk/government/publications/simple-guide-to-payment-by-results> (accessed Jan 25, 2022).
- 4 Boyd A, Cornish R, Johnson L, Simmonds S, Syddall H, Westbury L. Understanding Hospital episode statistics (HES). London, UK: CLOSER 2017. <https://www.closer.ac.uk/wp-content/uploads/CLOSER-resource-understanding-hospital-episode-statistics-2018.pdf>.
- 5 Burns EM, Rigby E, Mamidanna R, *et al*. Systematic review of discharge coding accuracy. *J Public Health* 2012; **34**: 138–48.
- 6 The processing cycle and HES data quality. NHS Digital. <https://digital.nhs.uk/data-and-information/data-tools-and-services/data-services/hospital-episode-statistics/the-processing-cycle-and-hes-data-quality> (accessed Jan 25, 2022).
- 7 Campbell A. Quality of mortality data during the coronavirus pandemic, England and Wales - Office for National Statistics. 2020; published online Dec 3. <https://www.ons.gov.uk/peoplepopulationandcommunity/birthsdeathsandmarriages/deaths/articles/qualityofmortalitydataduringthecoronaviruspandemicenglandandwales/2020> (accessed Jan 26, 2022).
- 8 NHS Data Quality Maturity Index. NHS Digital. <https://digital.nhs.uk/data-and-information/data-tools-and-services/data-services/data-quality> (accessed March 13, 2019).
- 9 Wood A, Denholm R, Hollings S, *et al*. Linked electronic health records for research on a nationwide cohort of more than 54 million people in England: data resource. *BMJ* 2021; **373**: n826.
- 10 [MI] National Data Opt-out, September 2021. NHS Digital. <https://digital.nhs.uk/data-and-information/publications/statistical/national-data-opt-out/september-2021> (accessed Jan 20, 2022).
- 11 Baker C. Population estimates & GP registers: why the difference? 2016; published online Dec 12. <https://commonslibrary.parliament.uk/population-estimates-gp-registers-why-the-difference/> (accessed Jan 20, 2022).
- 12 Summary of latest statistics. GOV.UK.

<https://www.gov.uk/government/statistics/immigration-statistics-year-ending-september-2021/summary-of-latest-statistics> (accessed Jan 20, 2022).

- 13 Clare T, Twohig KA, O'Connell A-M, Dabrera G. Timeliness and completeness of laboratory-based surveillance of COVID-19 cases in England. *Public Health* 2021; **194**: 163–6.
- 14 Denaxas S, Gonzalez-Izquierdo A, Direk K, *et al.* UK phenomics platform for developing and validating electronic health record phenotypes: CALIBER. *J Am Med Inform Assoc* 2019; **26**: 1545–59.
- 15 Data Access Request Service (DARS). <https://digital.nhs.uk/services/data-access-request-service-dars> (accessed May 21, 2021).
